# Supplementary material for: Disintegration half-life of biodegradable plastic films on different marine beach sediments
Source: PeerJ journal article supplement (doi:10.7717/peerj.11981), 2021-08-10
Supplement: FigSI-3.pdf [file FigSI-3.pdf]

Salinity

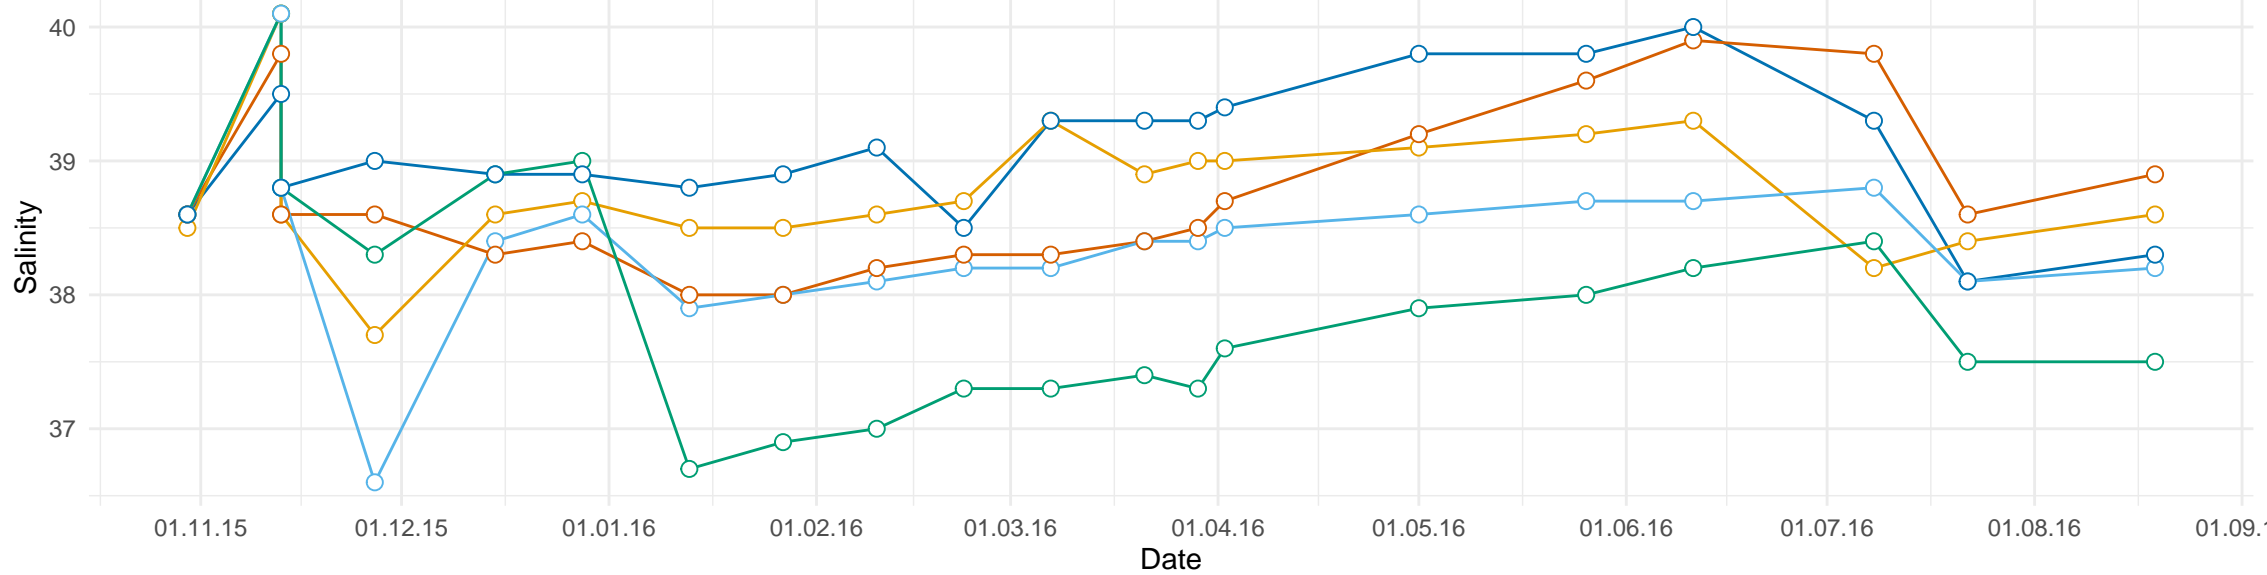

Oxygen concentration

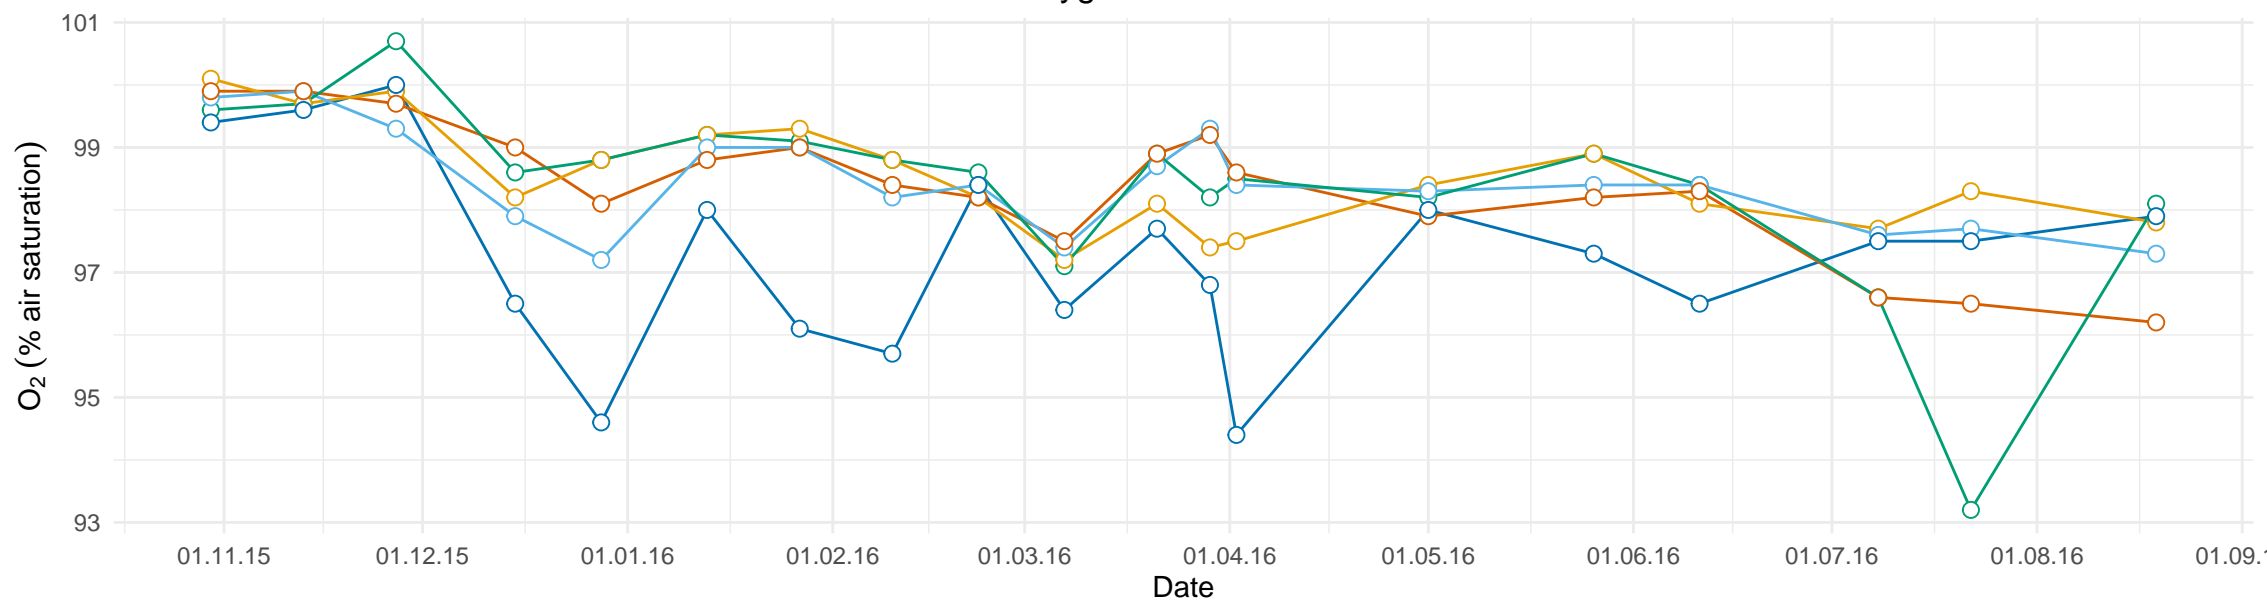

Temperature

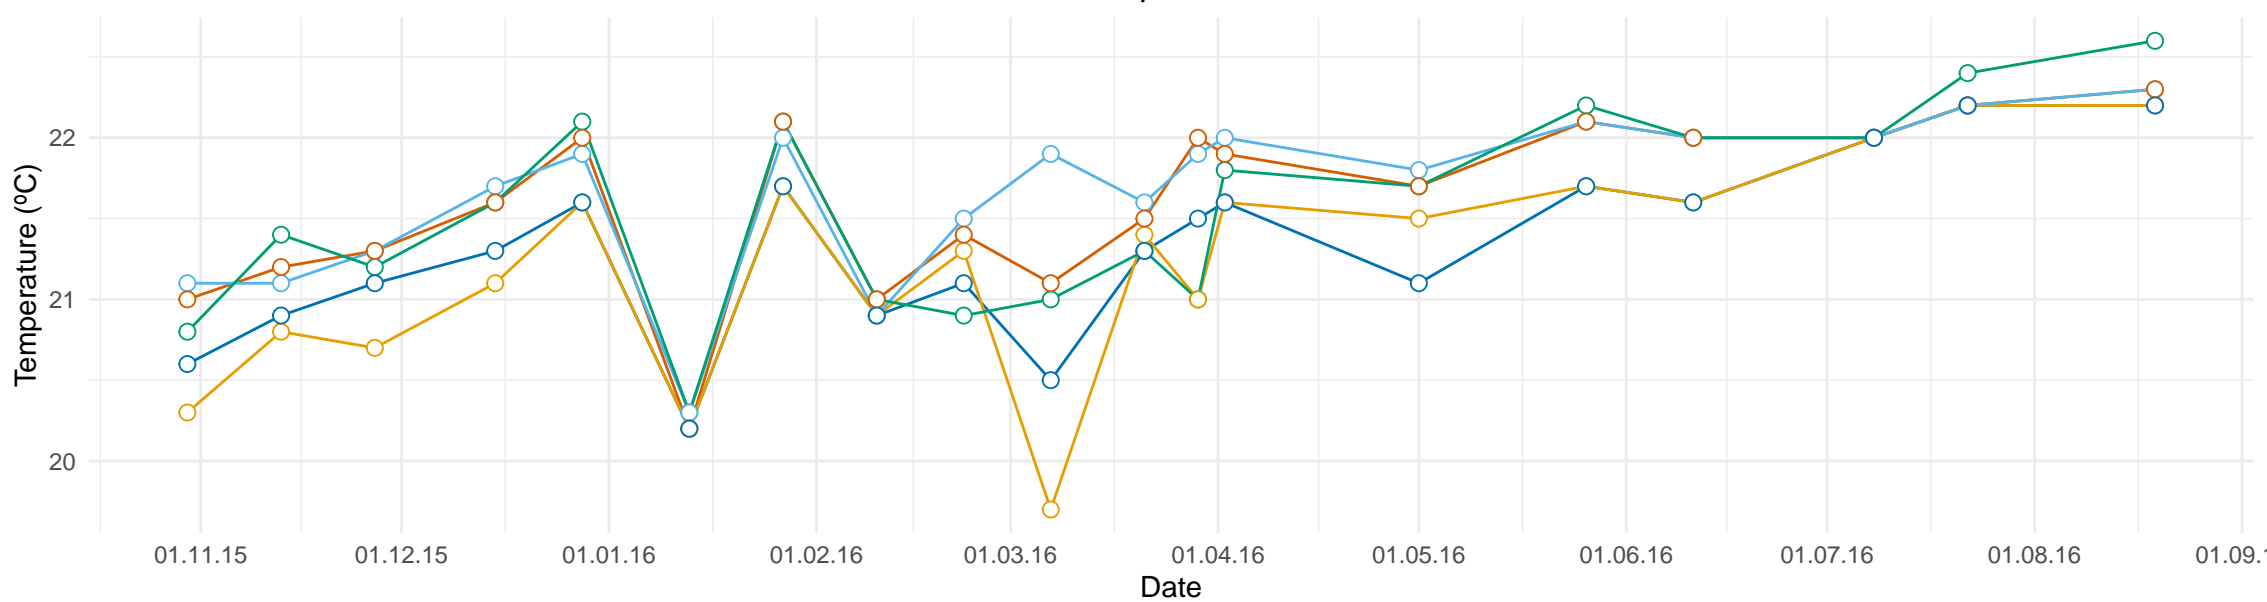

pH

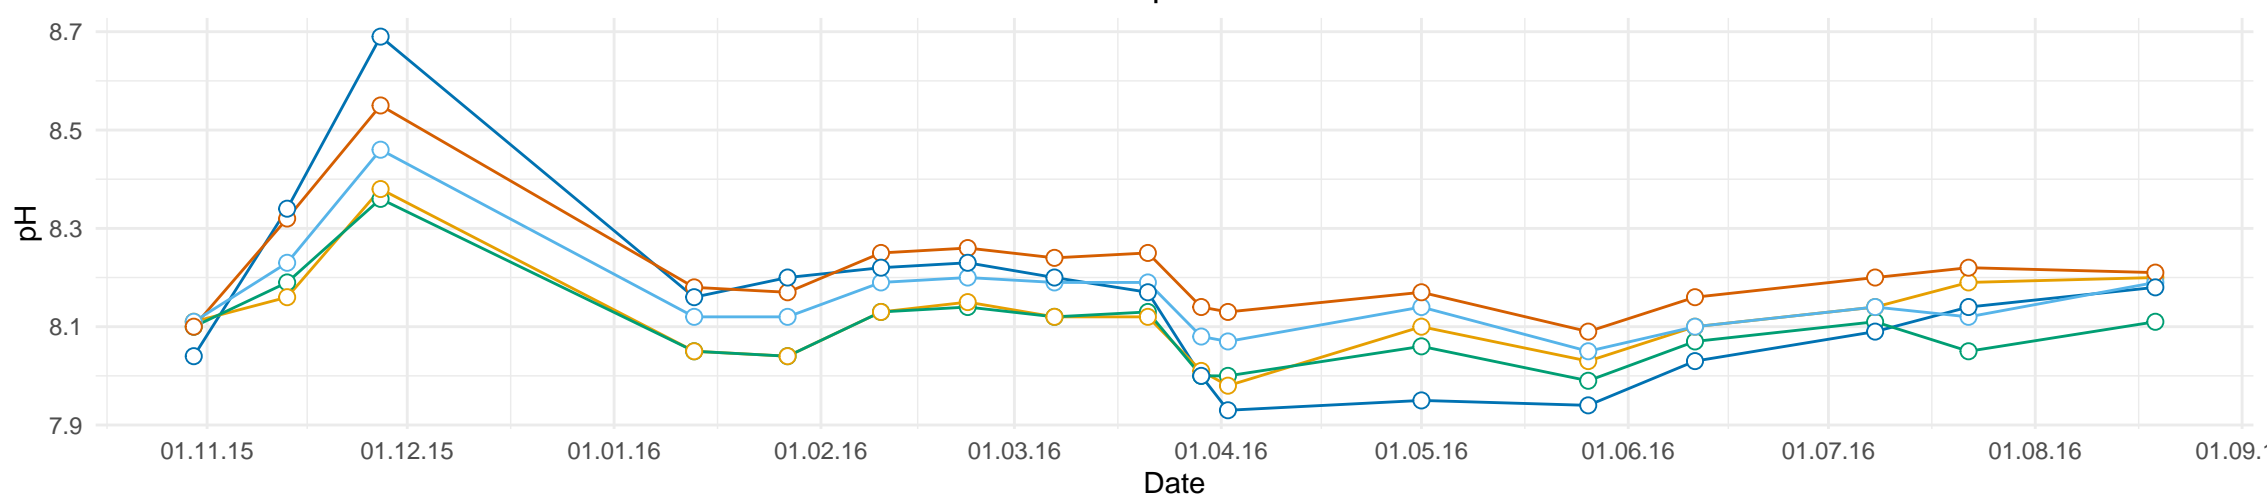

—○— mud —○— 63-250 µm —○— 500-1000 µm —○— 250-500 µm —○— >1000 µm
