# Supplementary material for: Disintegration half-life of biodegradable plastic films on different marine beach sediments
Source: PeerJ journal article supplement (doi:10.7717/peerj.11981), 2021-08-10
Supplement: FigSI-5.pdf [file FigSI-5.pdf]

### Salinity

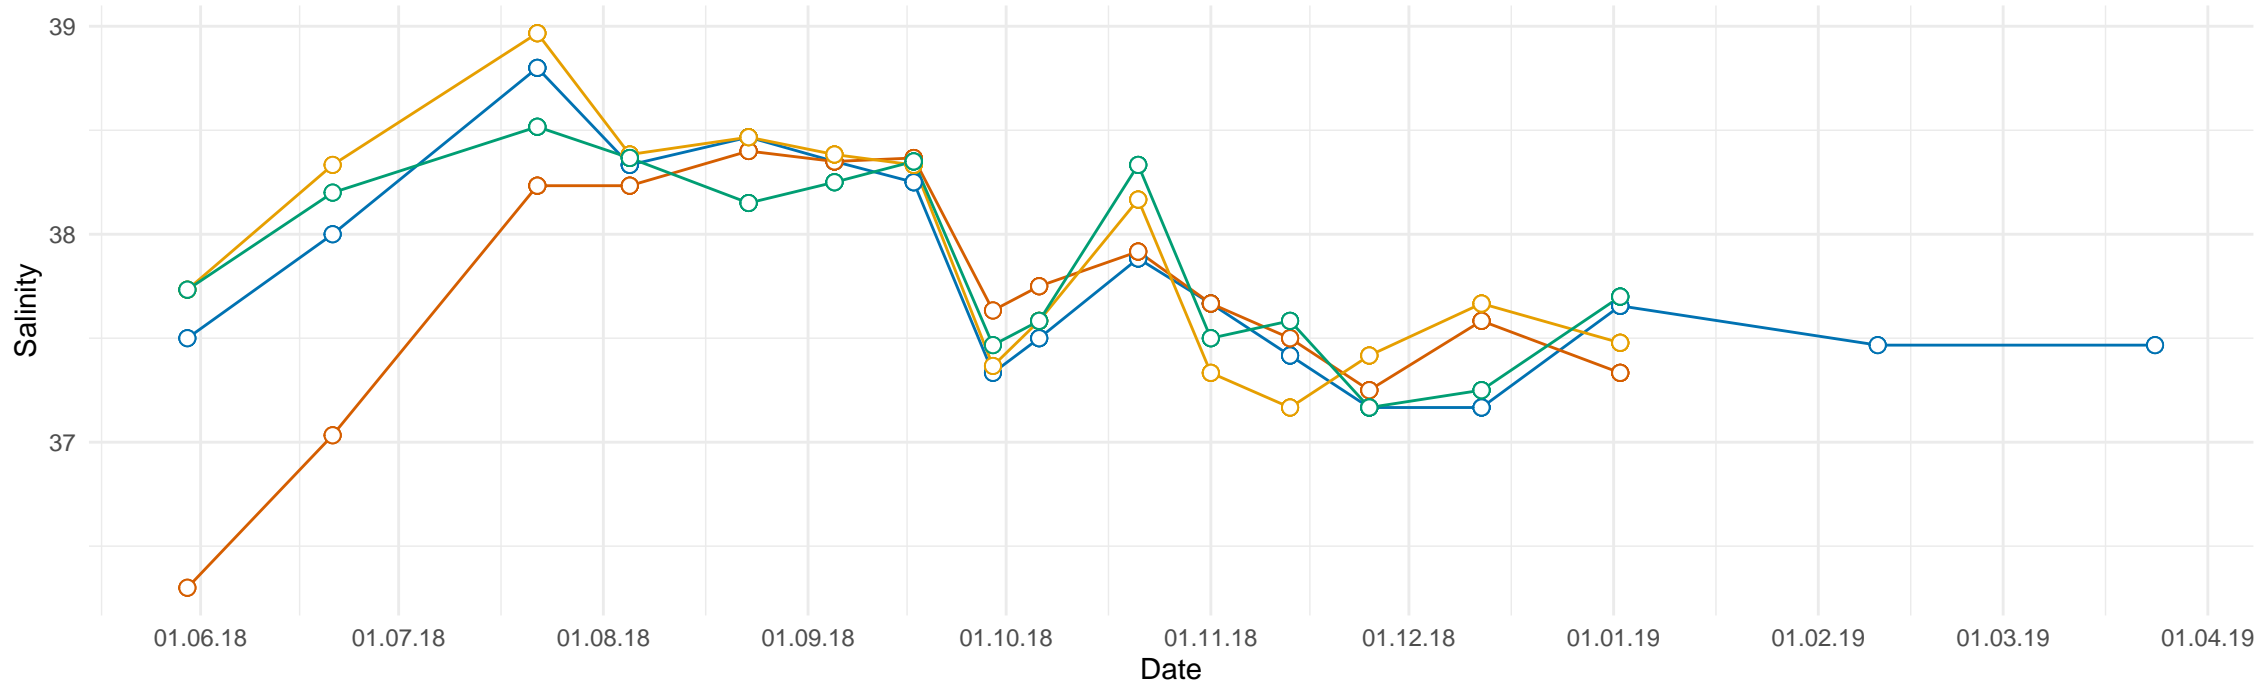

### Oxygen concentration

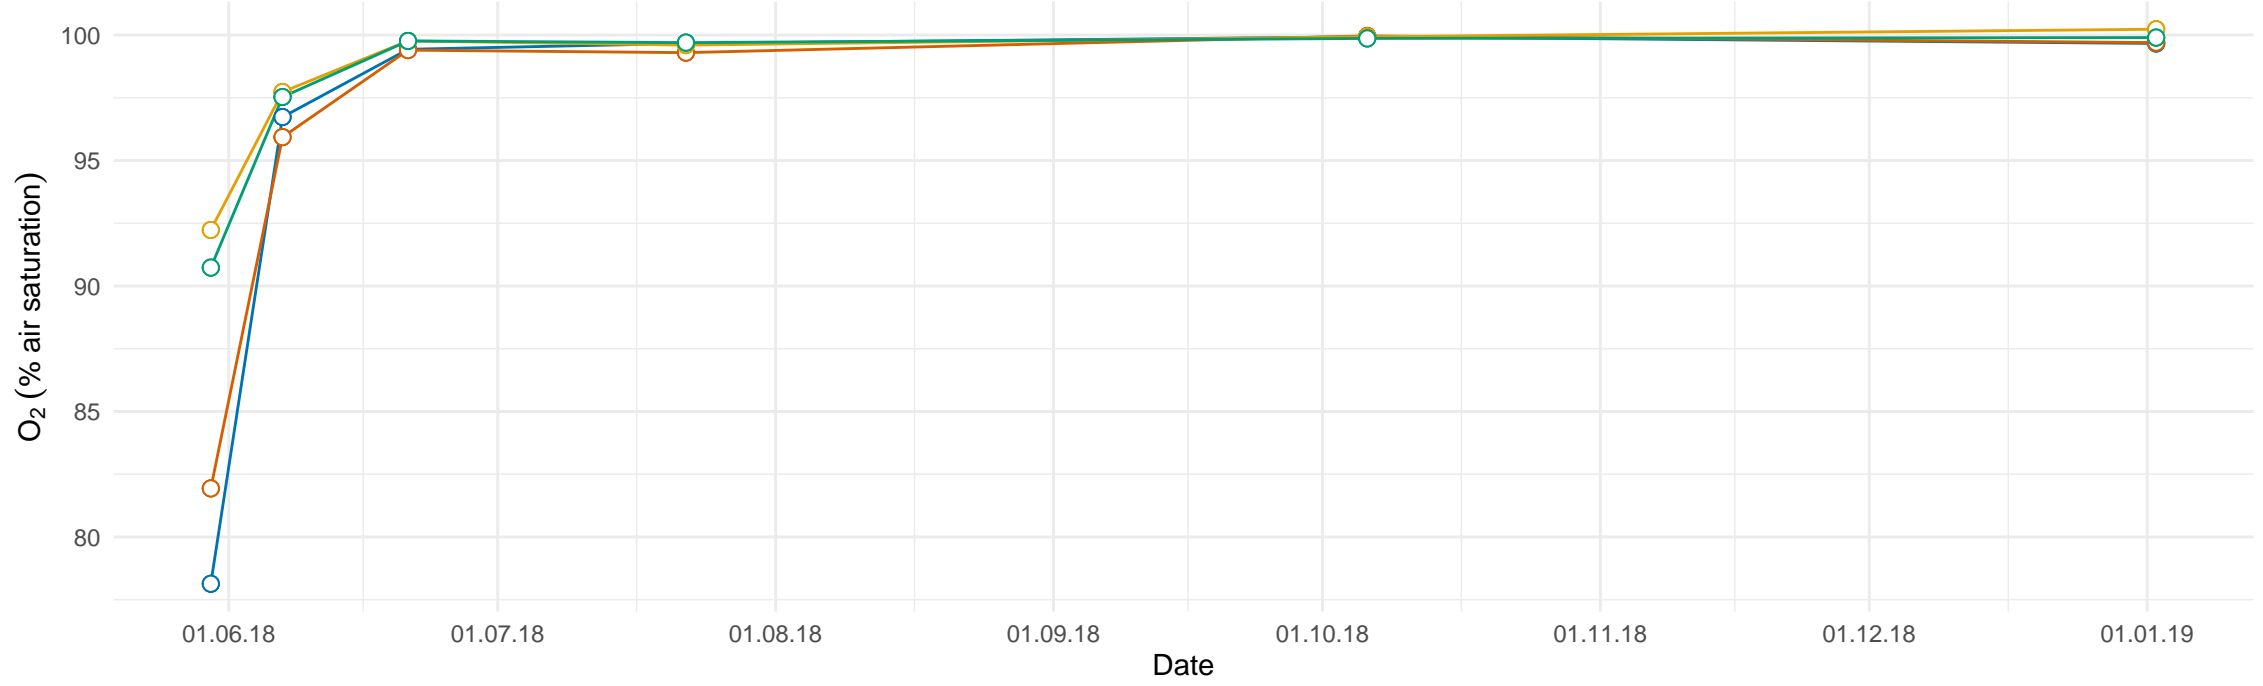

### pH

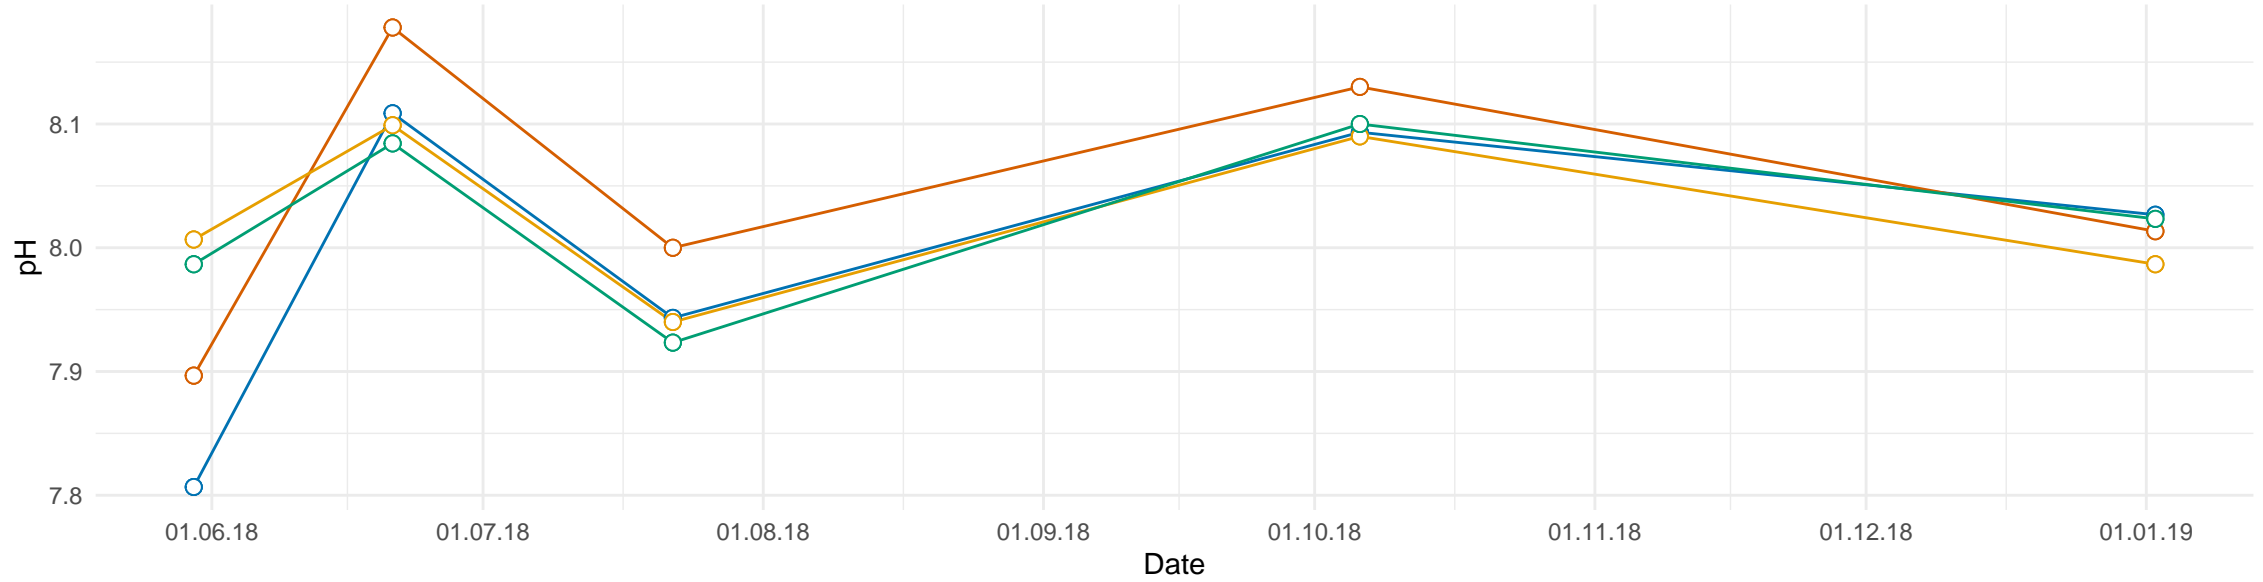

—○— Fetovaia —○— Marina di Campo —○— Naregno —○— Portoferraio
