# Supplementary material for: Disintegration half-life of biodegradable plastic films on different marine beach sediments
Source: PeerJ journal article supplement (doi:10.7717/peerj.11981), 2021-08-10

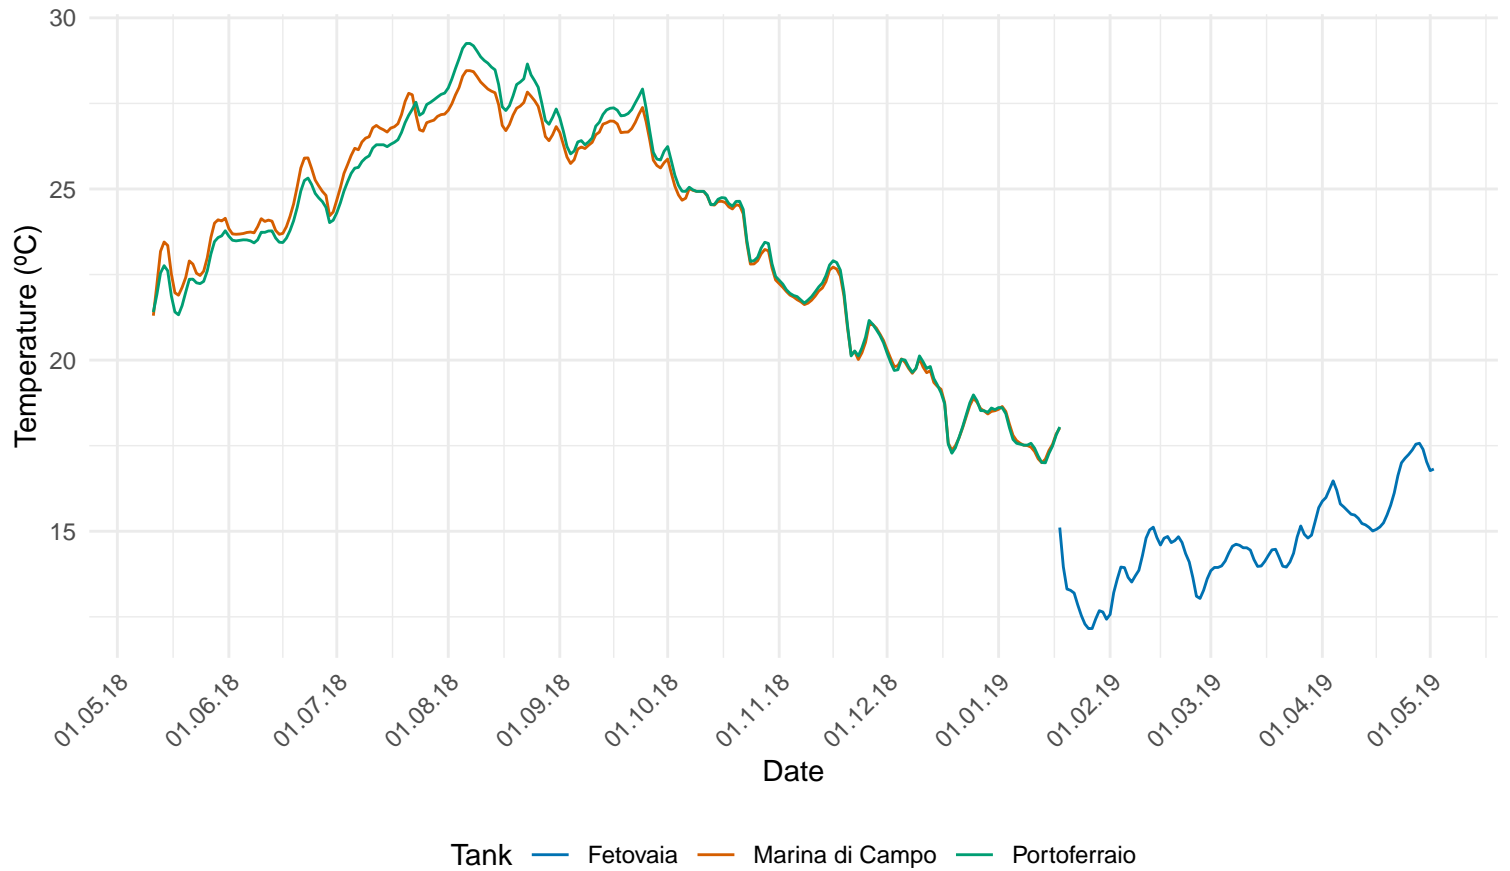

Supplement: FigSI-6.pdf [file FigSI-6.pdf]
