# Supplementary material for: Disintegration half-life of biodegradable plastic films on different marine beach sediments
Source: PeerJ journal article supplement (doi:10.7717/peerj.11981), 2021-08-10
Supplement: FigSI-7.pdf [file FigSI-7.pdf]

A)

Performance of *Mater-Bi* on all 4 sediments after 4 months

Marina di Campo

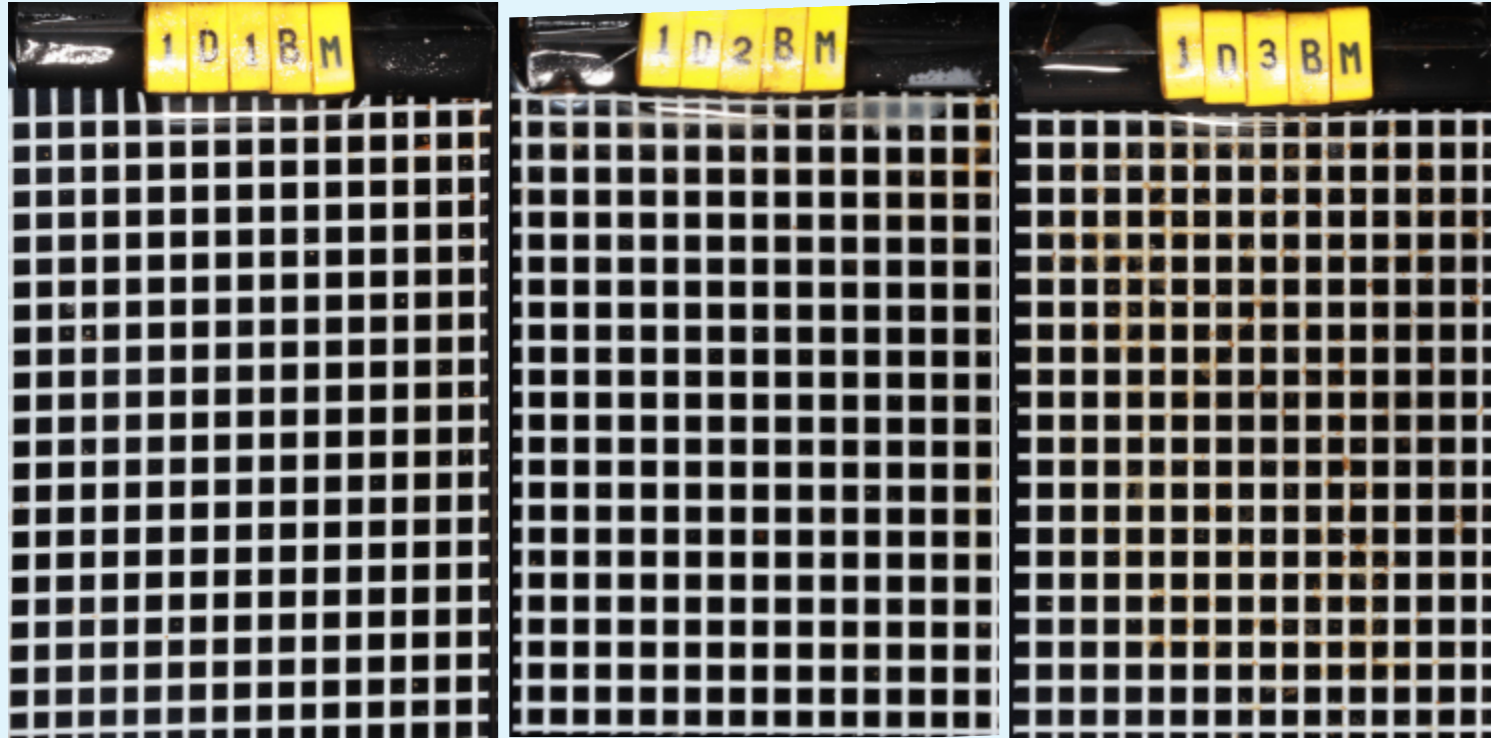

Portoferraio

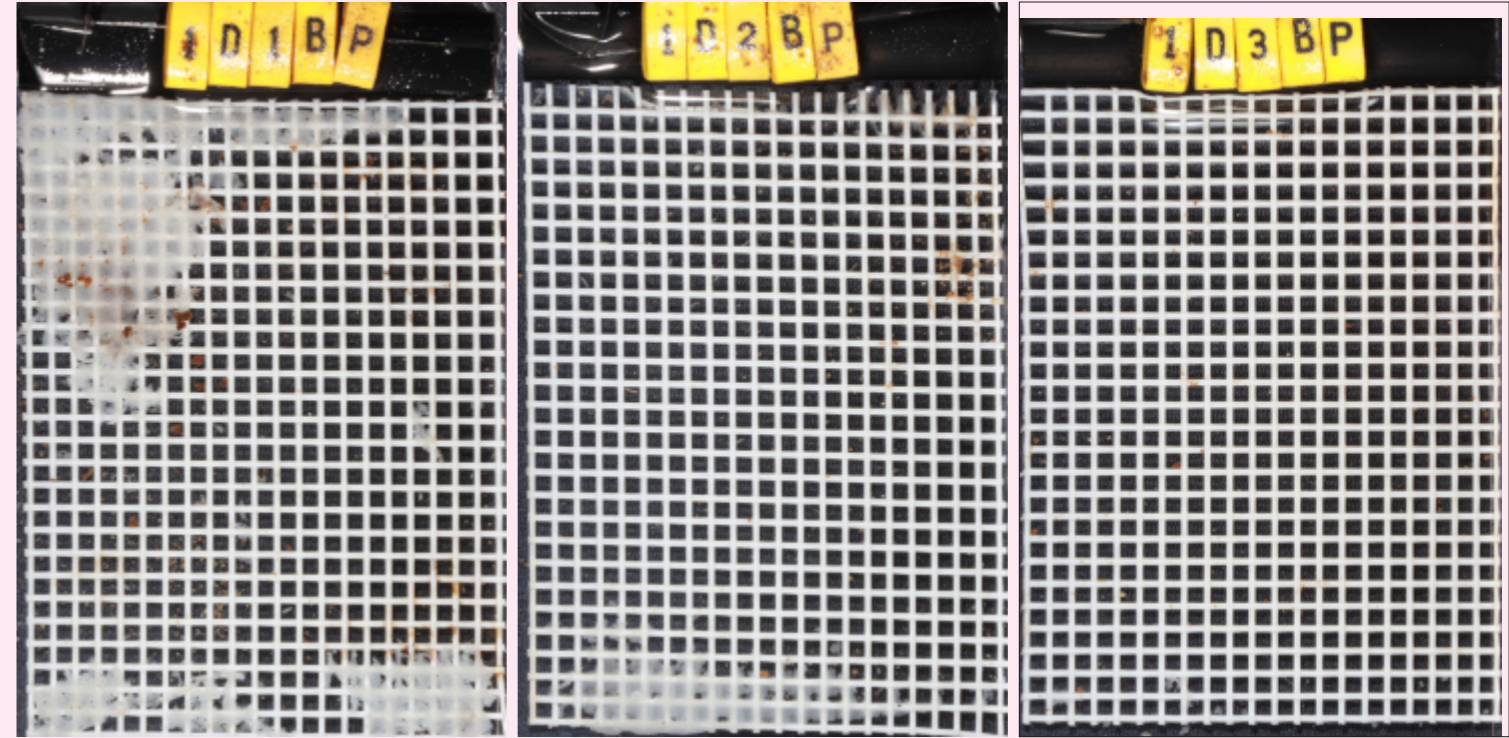

Naregno

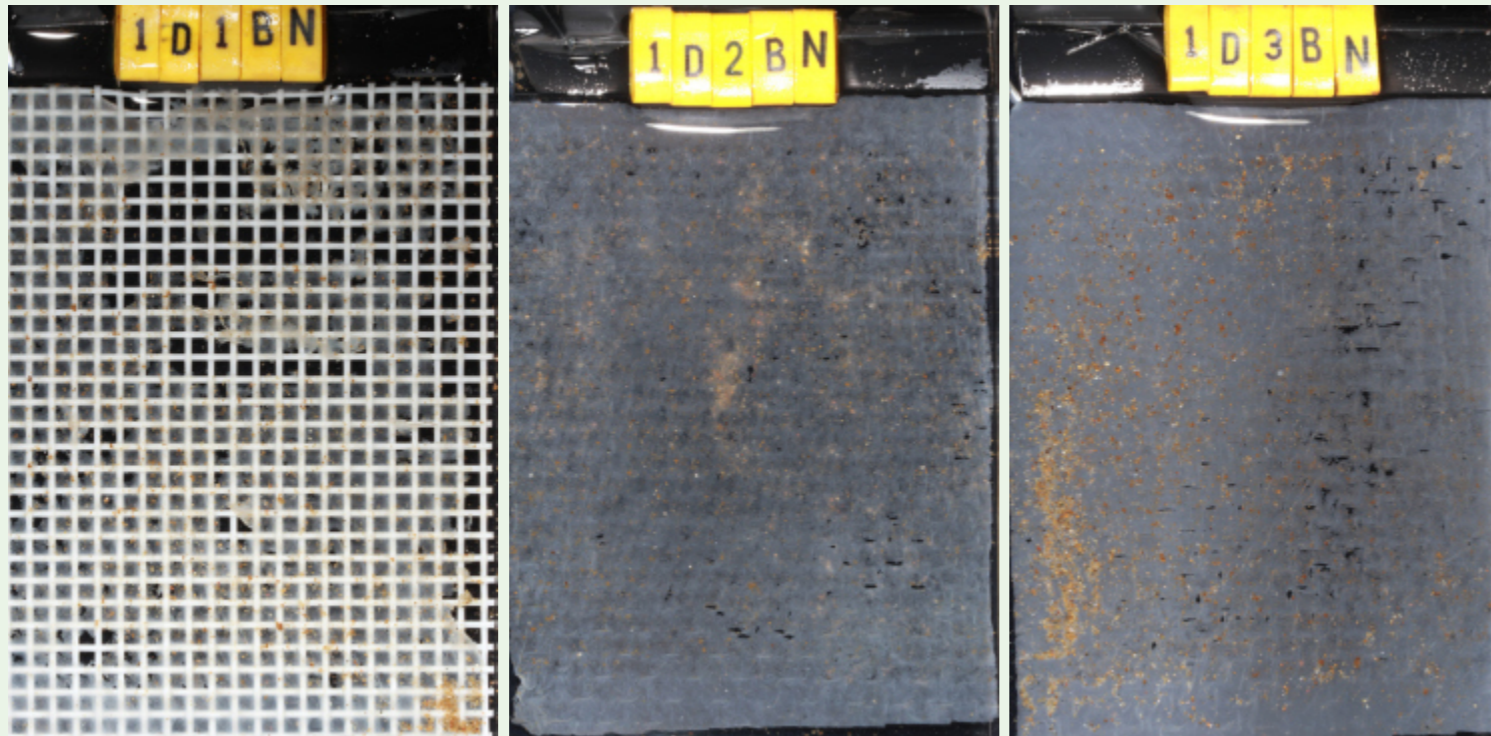

Fetovaia

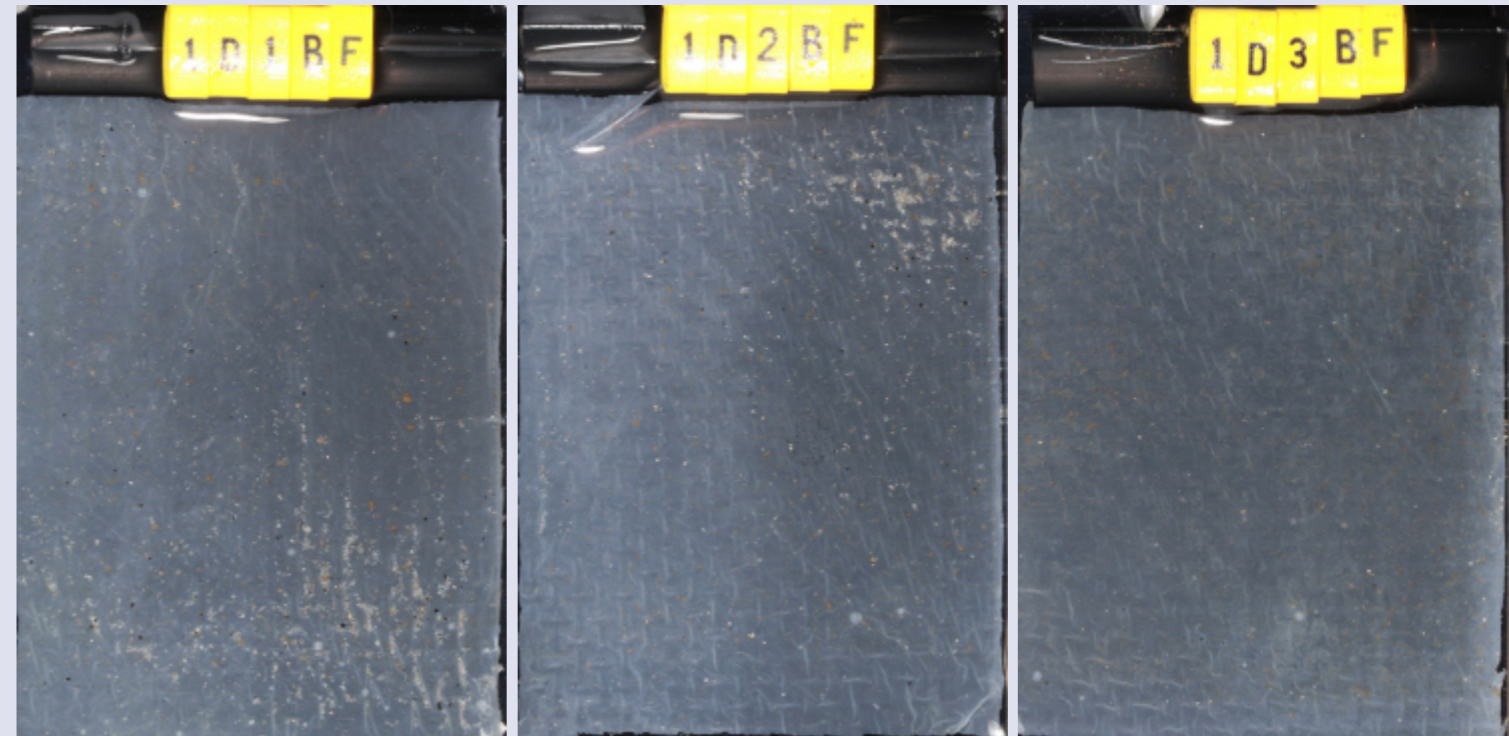



B)

Performance of *Mater-Bi* on all 4 sediments after 6 months

Marina di Campo

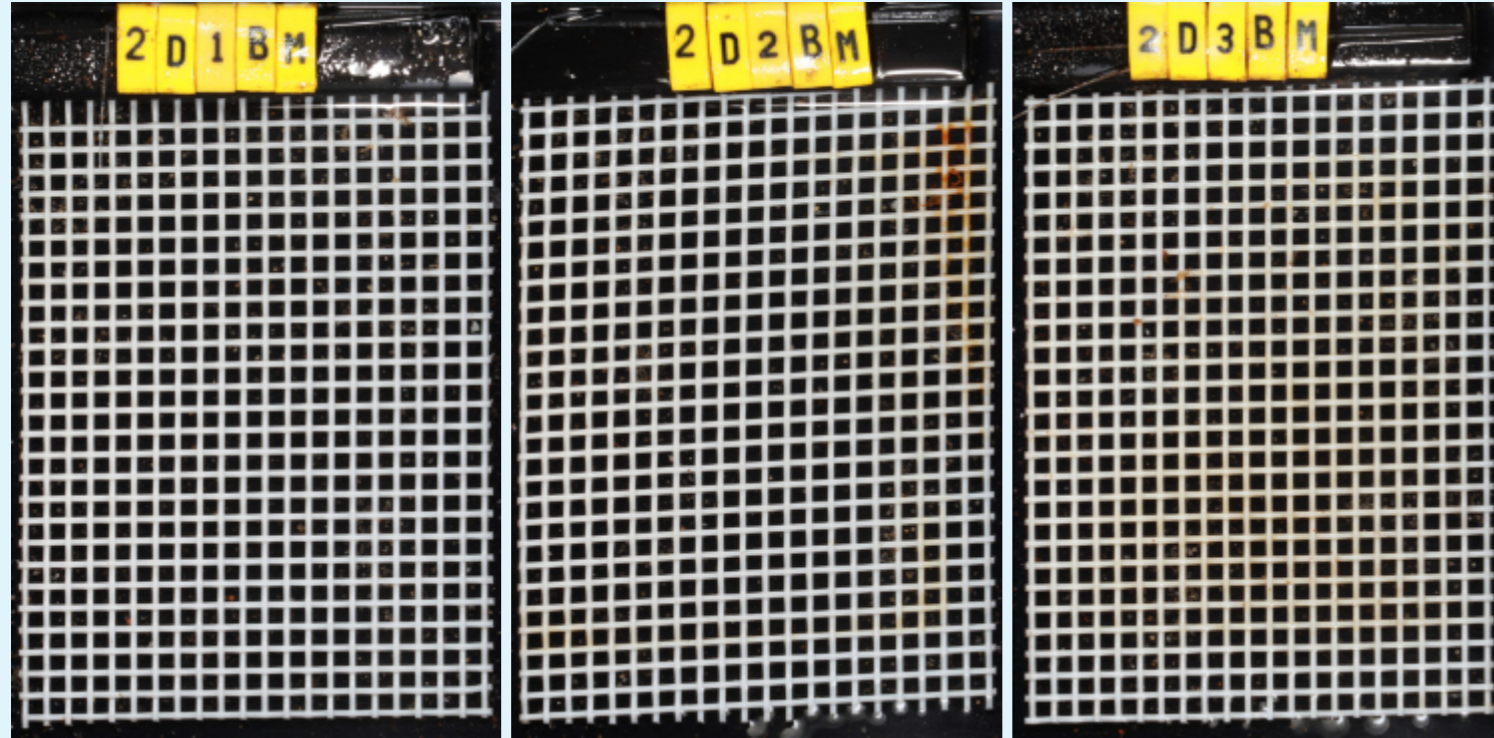

Portoferraio

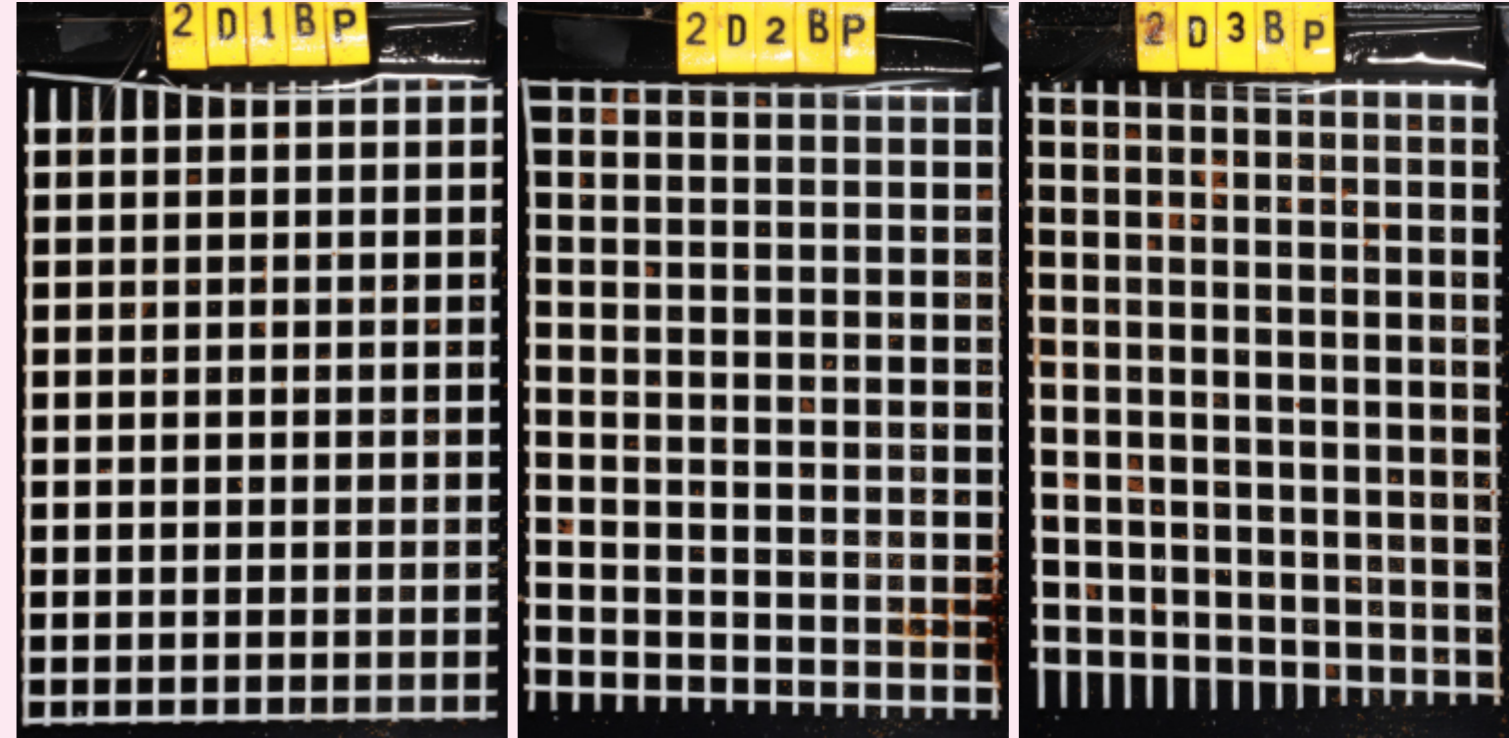

Naregno

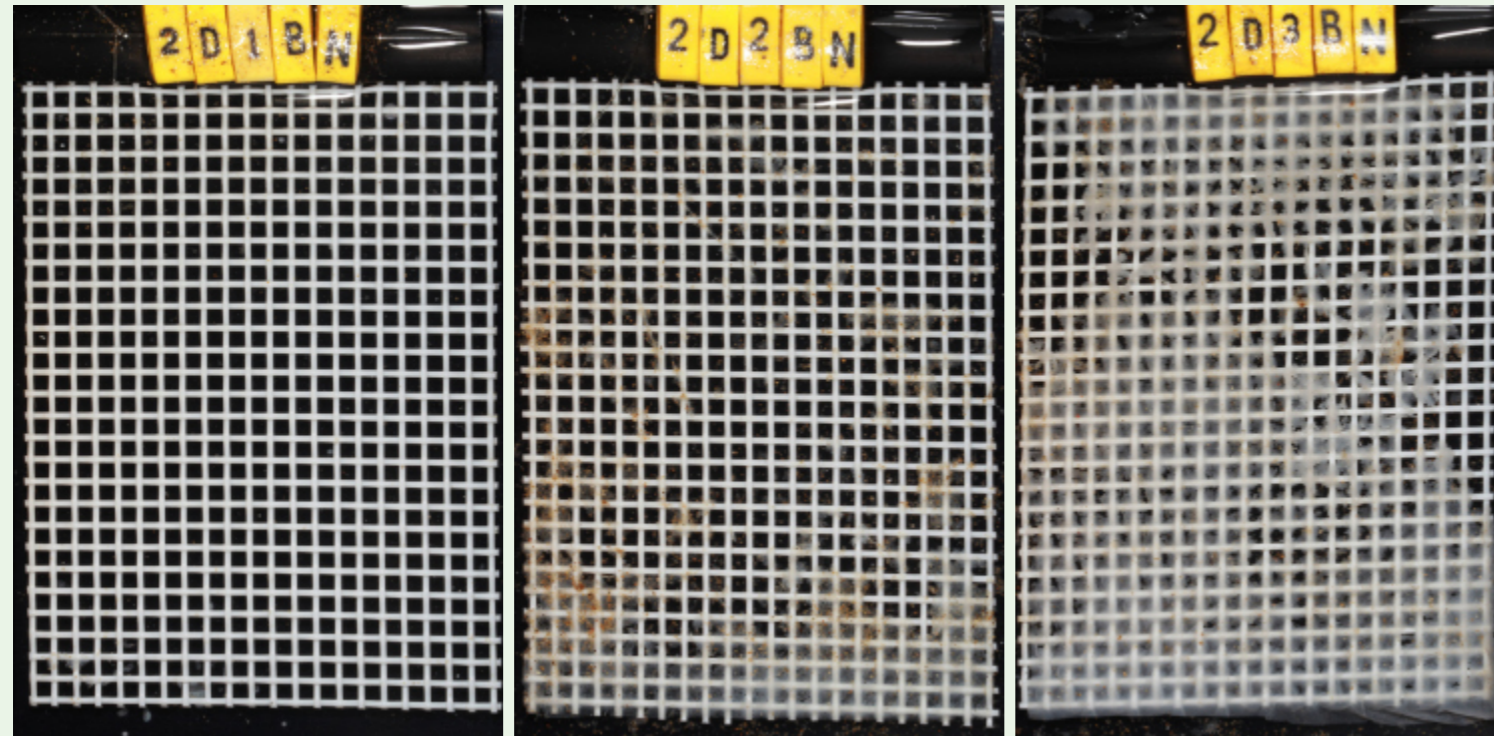

Fetovaia

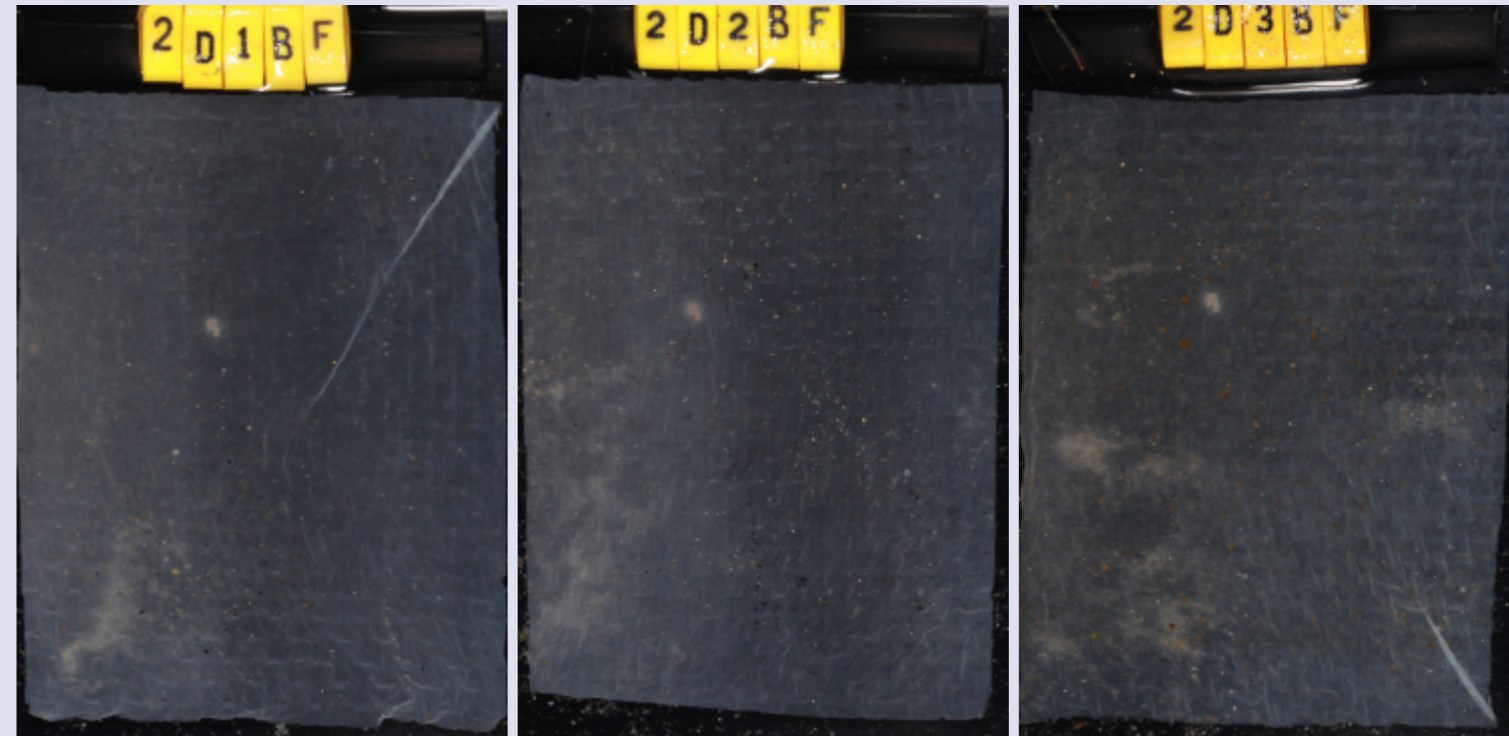

\*Specimen 2D2BN adhering to both meshes.  
See pages 36–37 for details.



C)

Performance of *Mater-Bi* on 3 sediments after 8 months, and on 1 sediment after 12 months

Marina di Campo

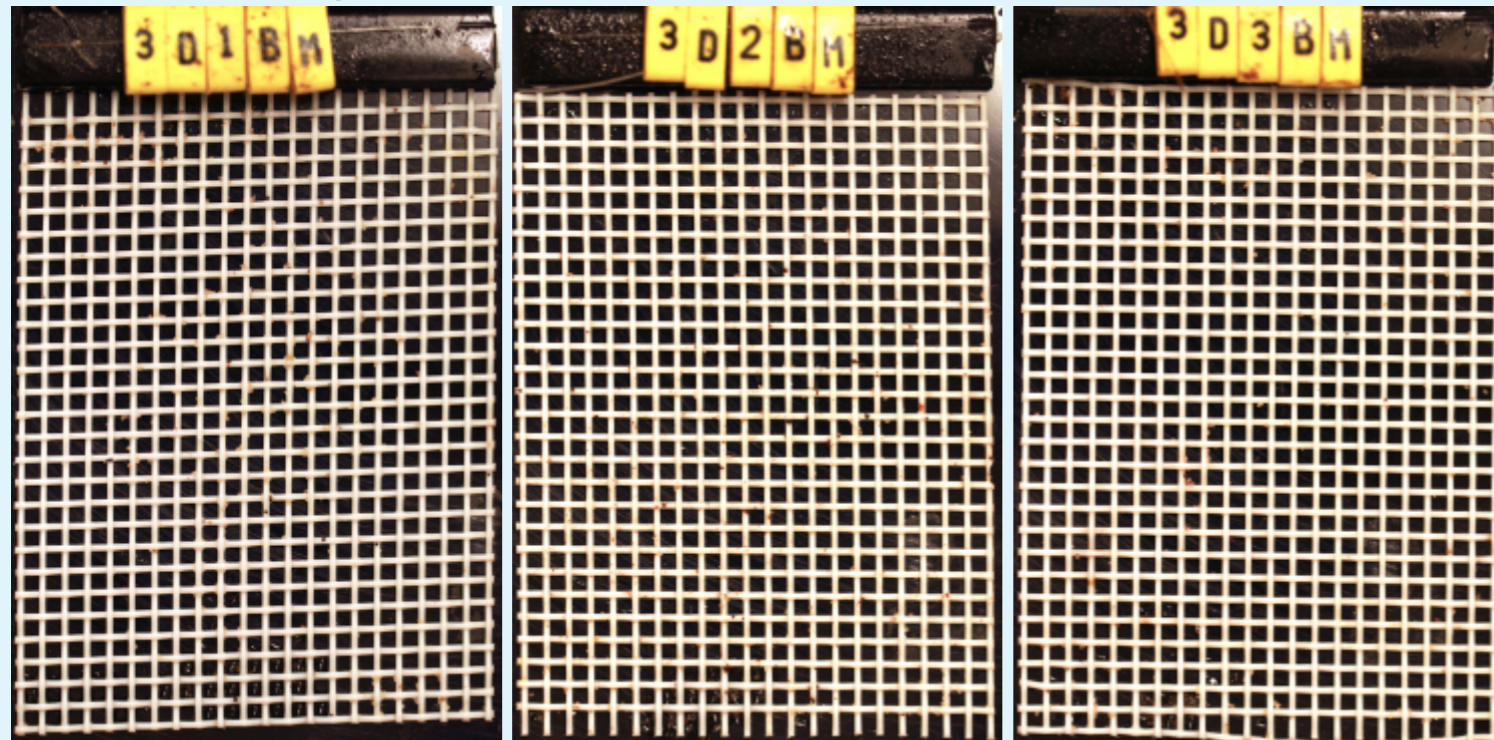

Portoferraio

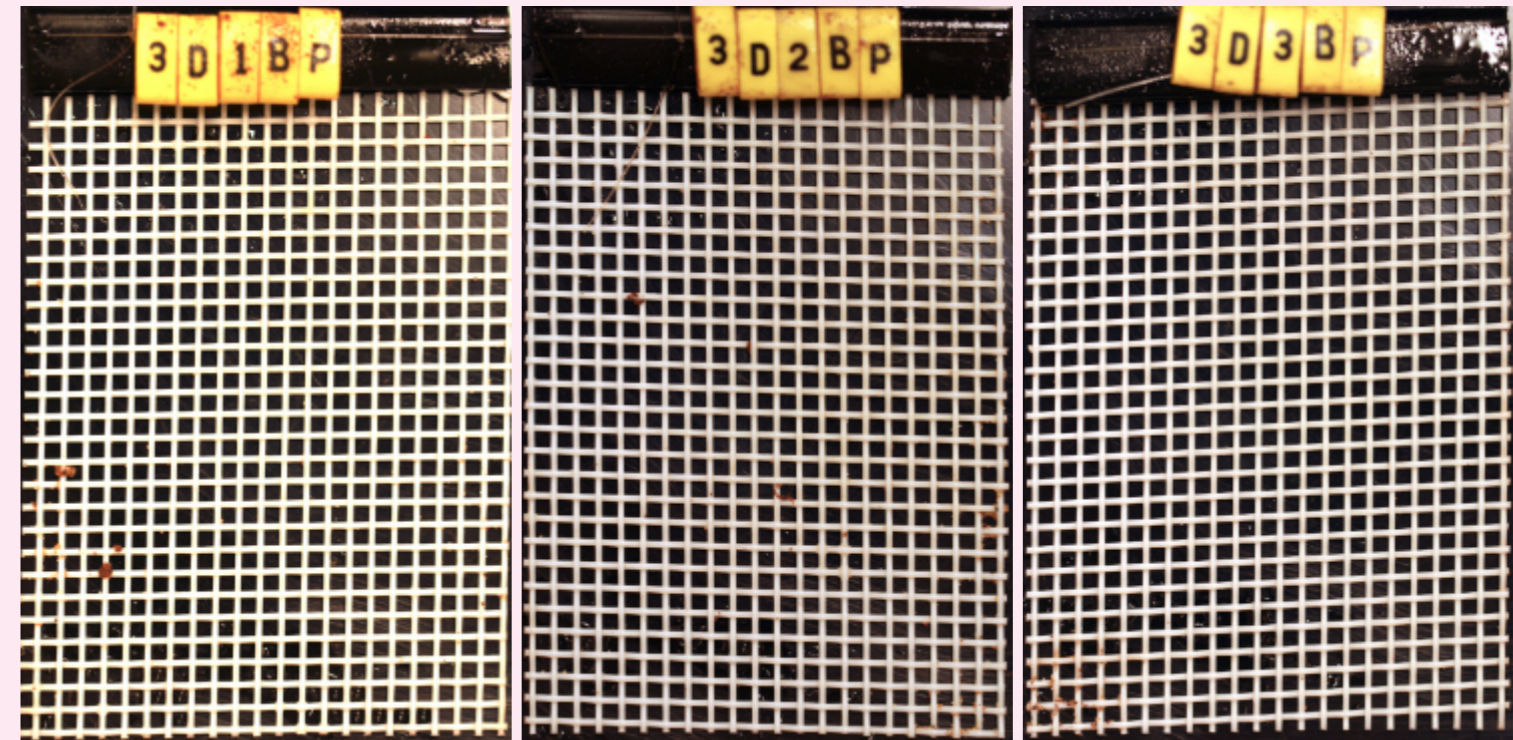

Naregno

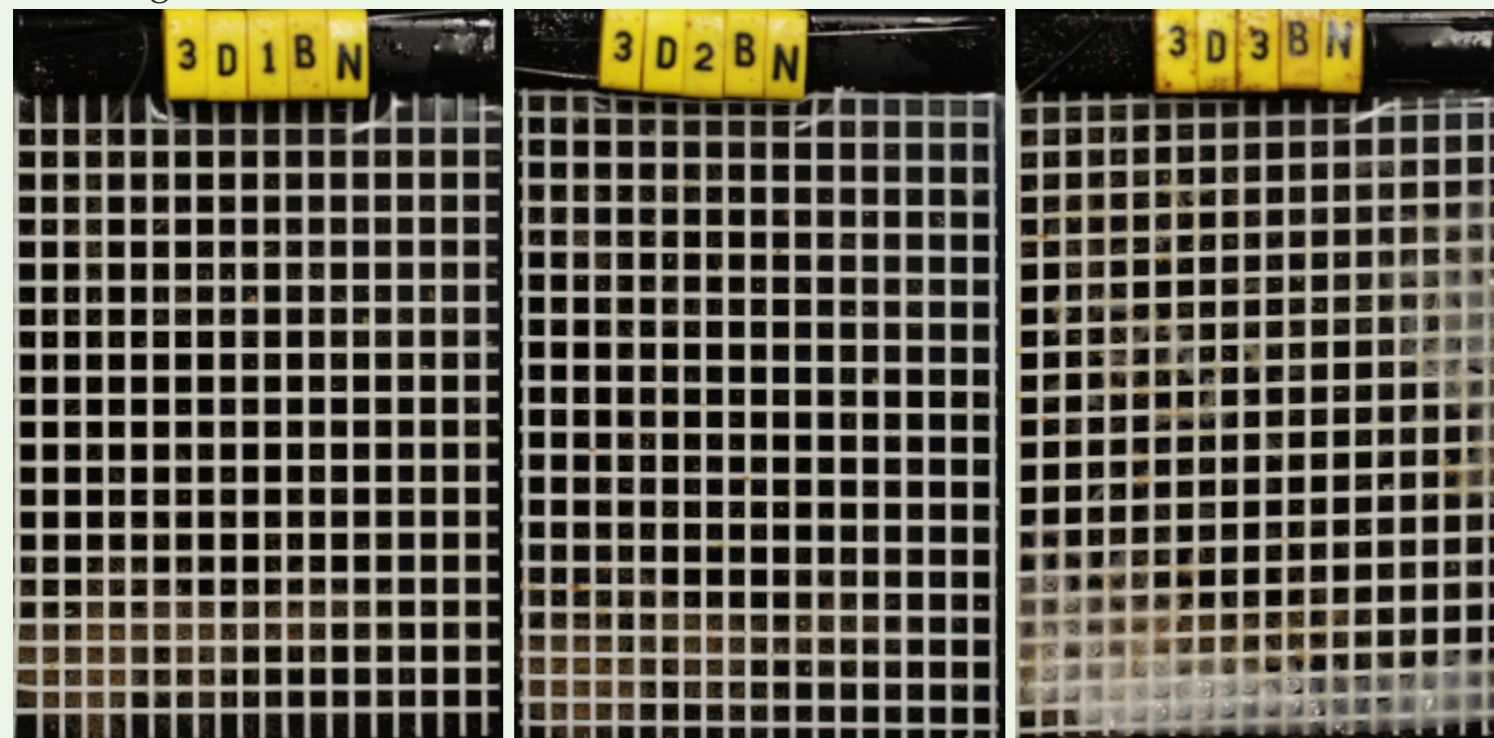

Fetovaia

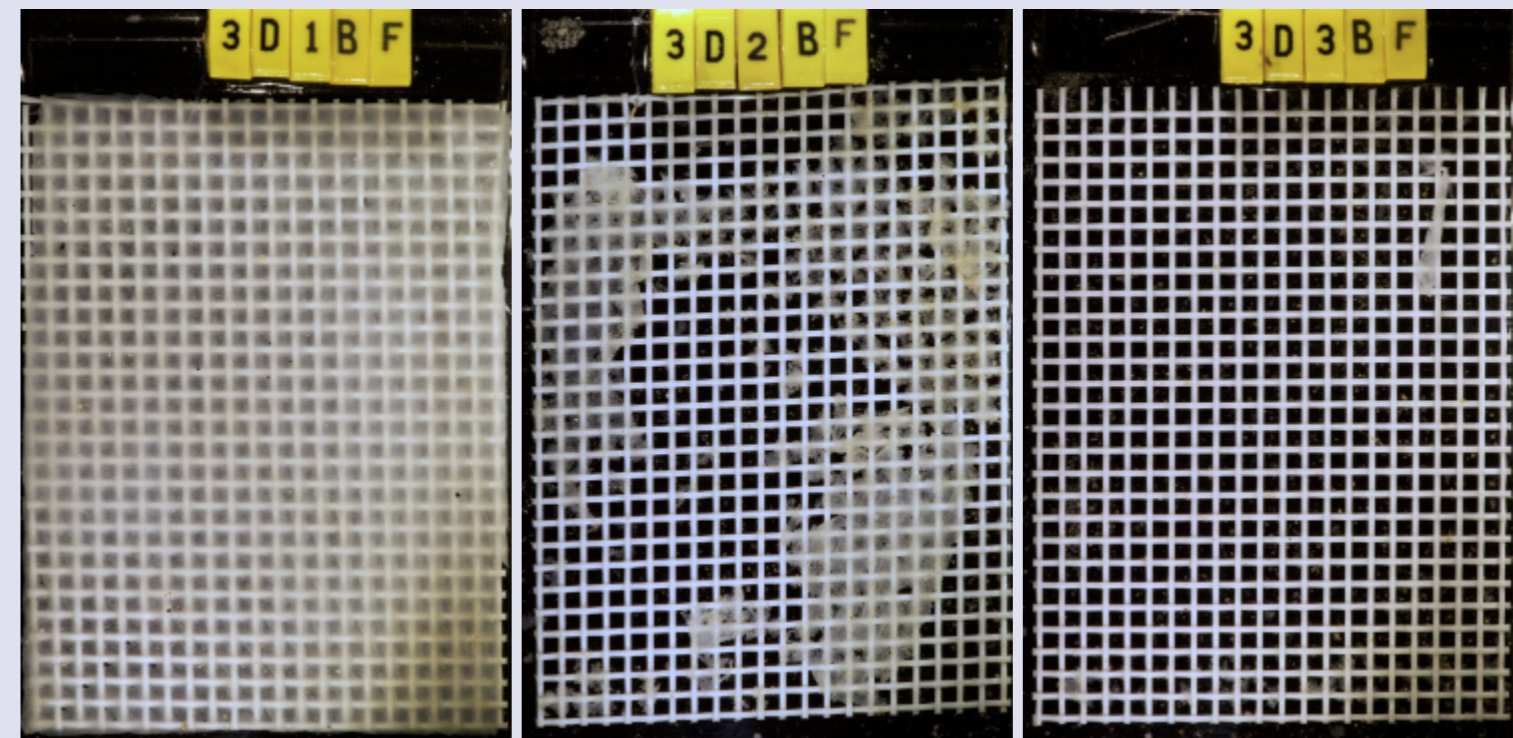



D)

Performance of *PHB* 85  $\mu\text{m}$  on all 4 sediments after 4 months

Marina di Campo

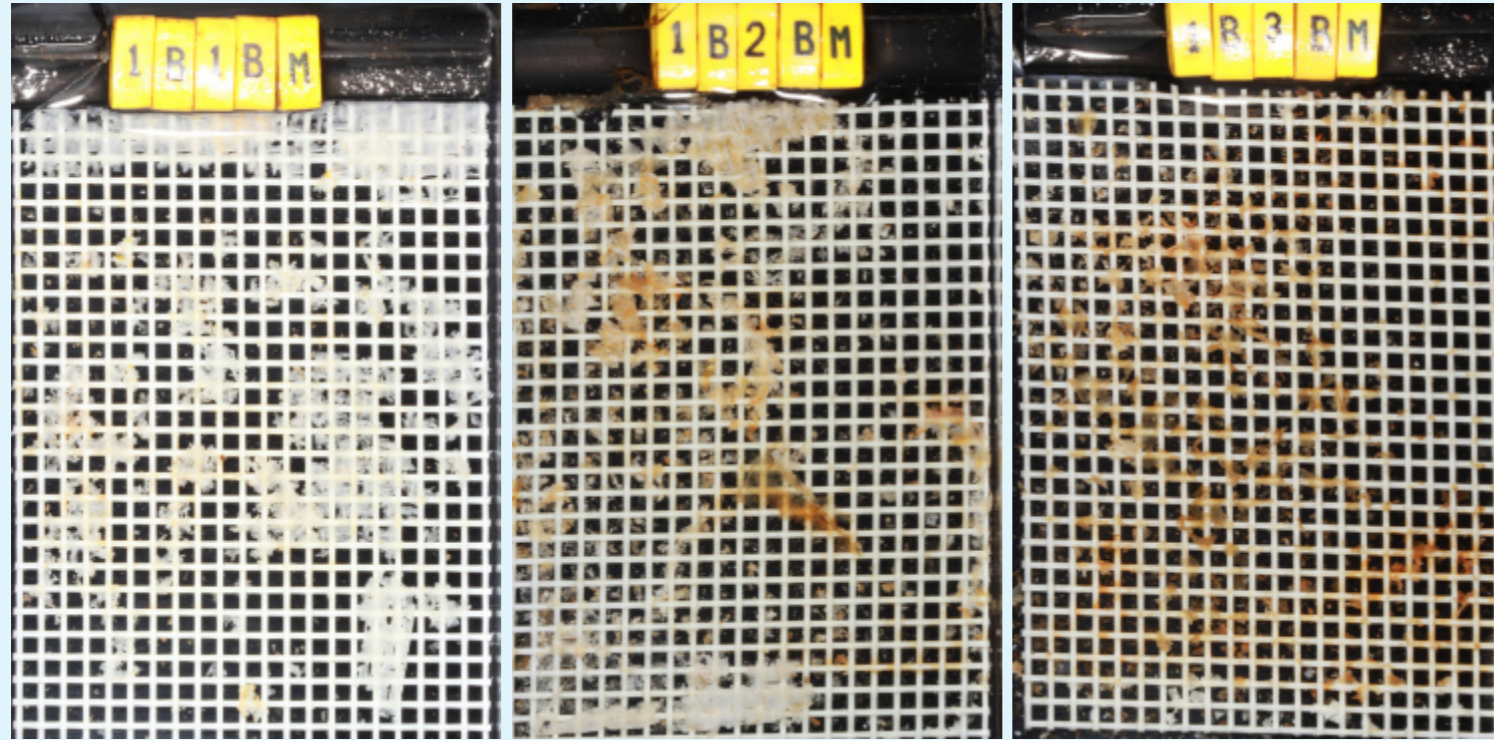

Portoferraio

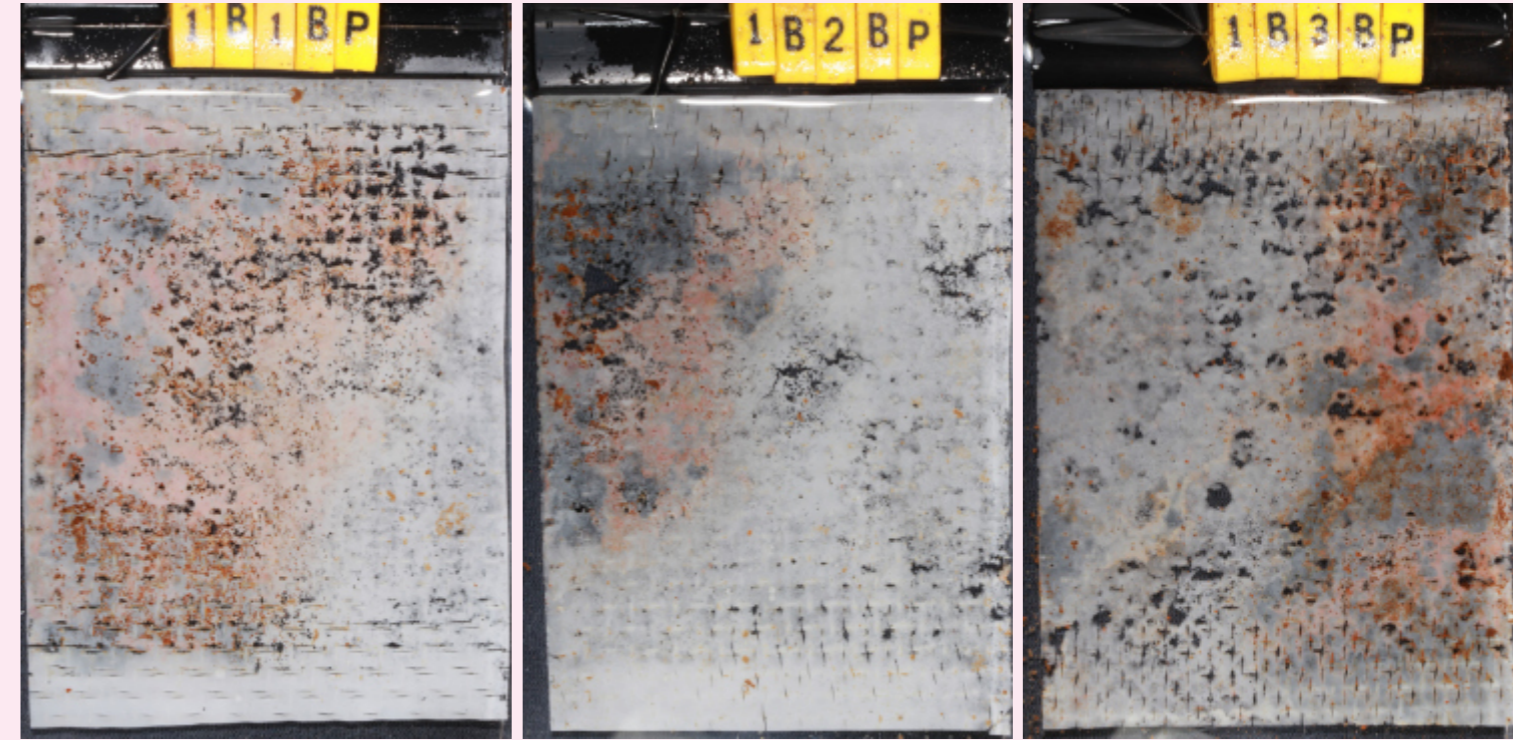

Naregno

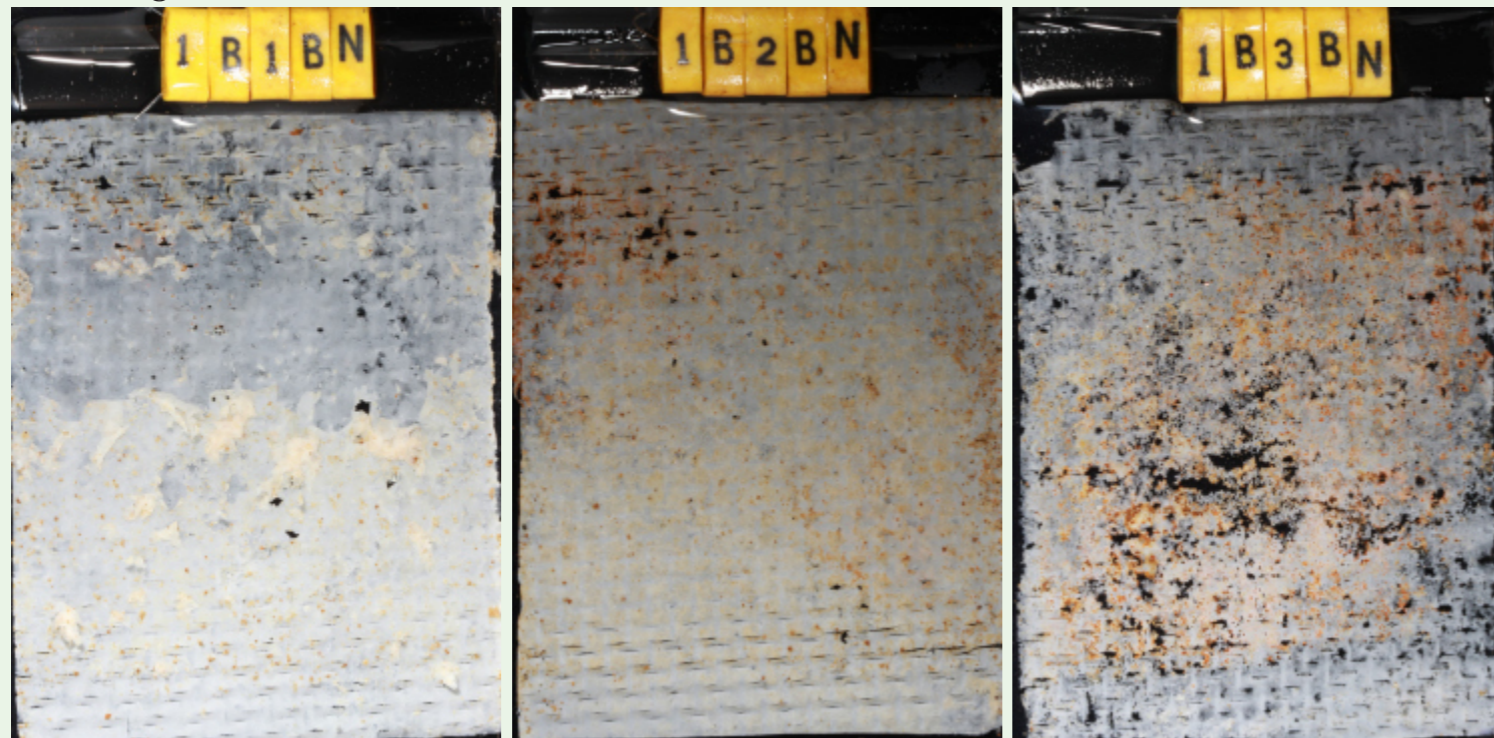

Fetovaia

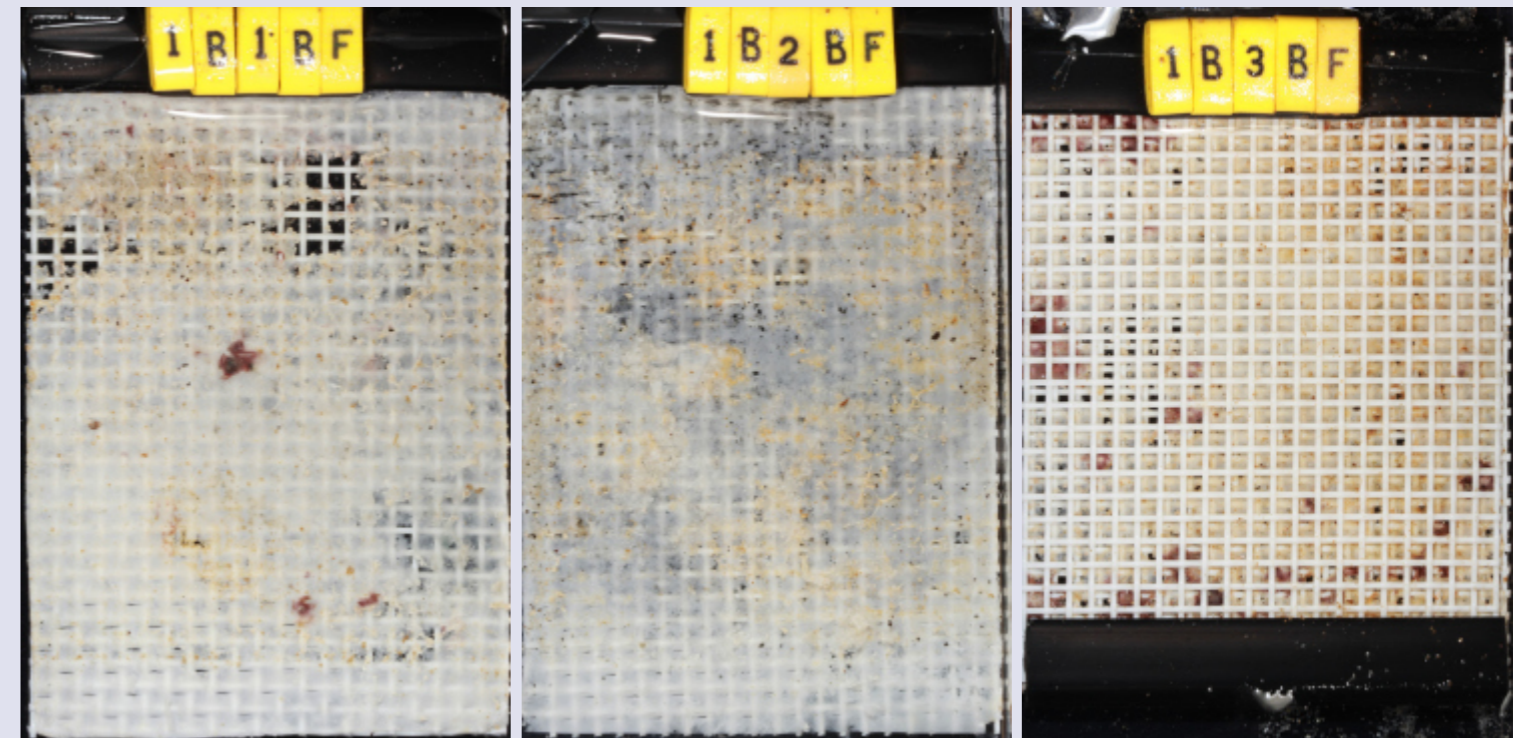



E)

Performance of *PHB 85 μm* on all 4 sediments after 6 months

Marina di Campo

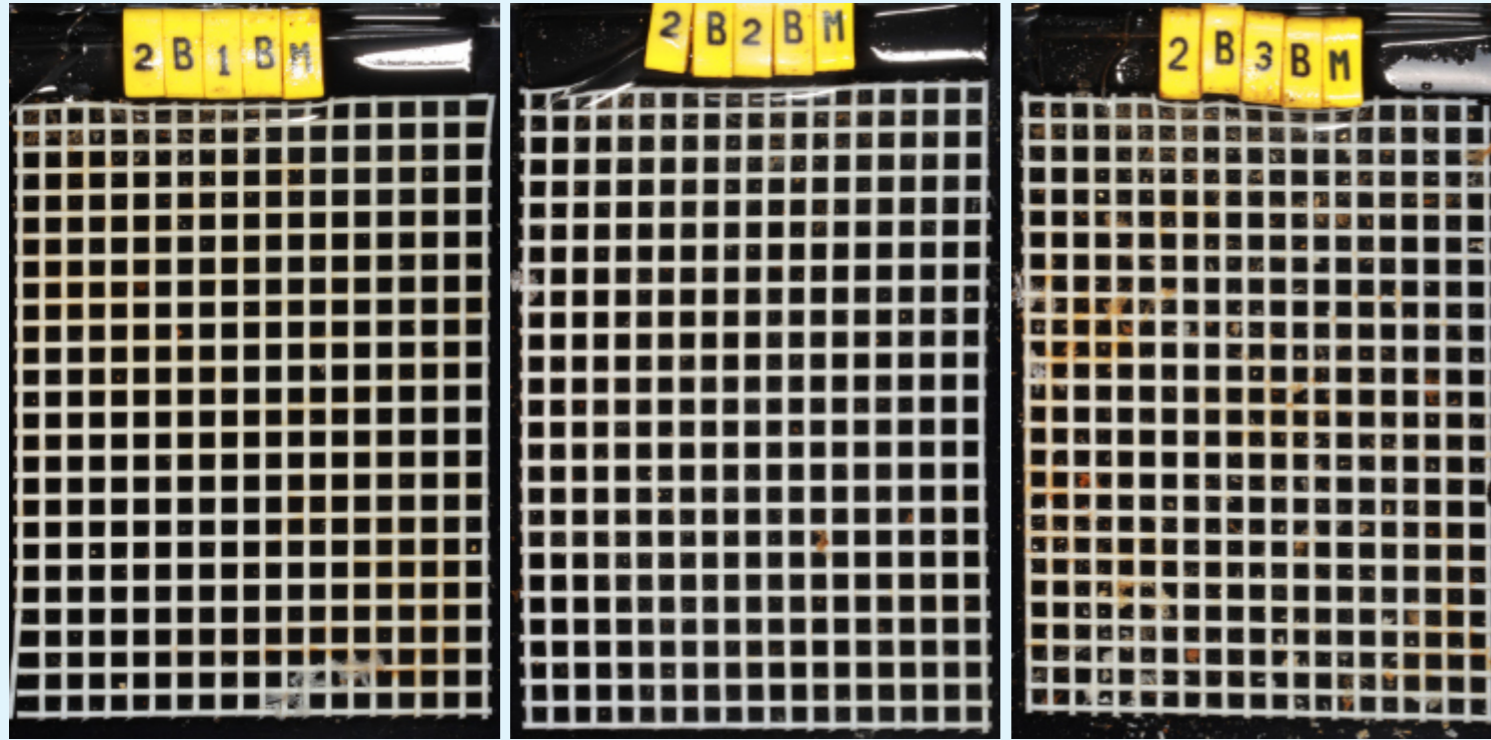

Portoferraio

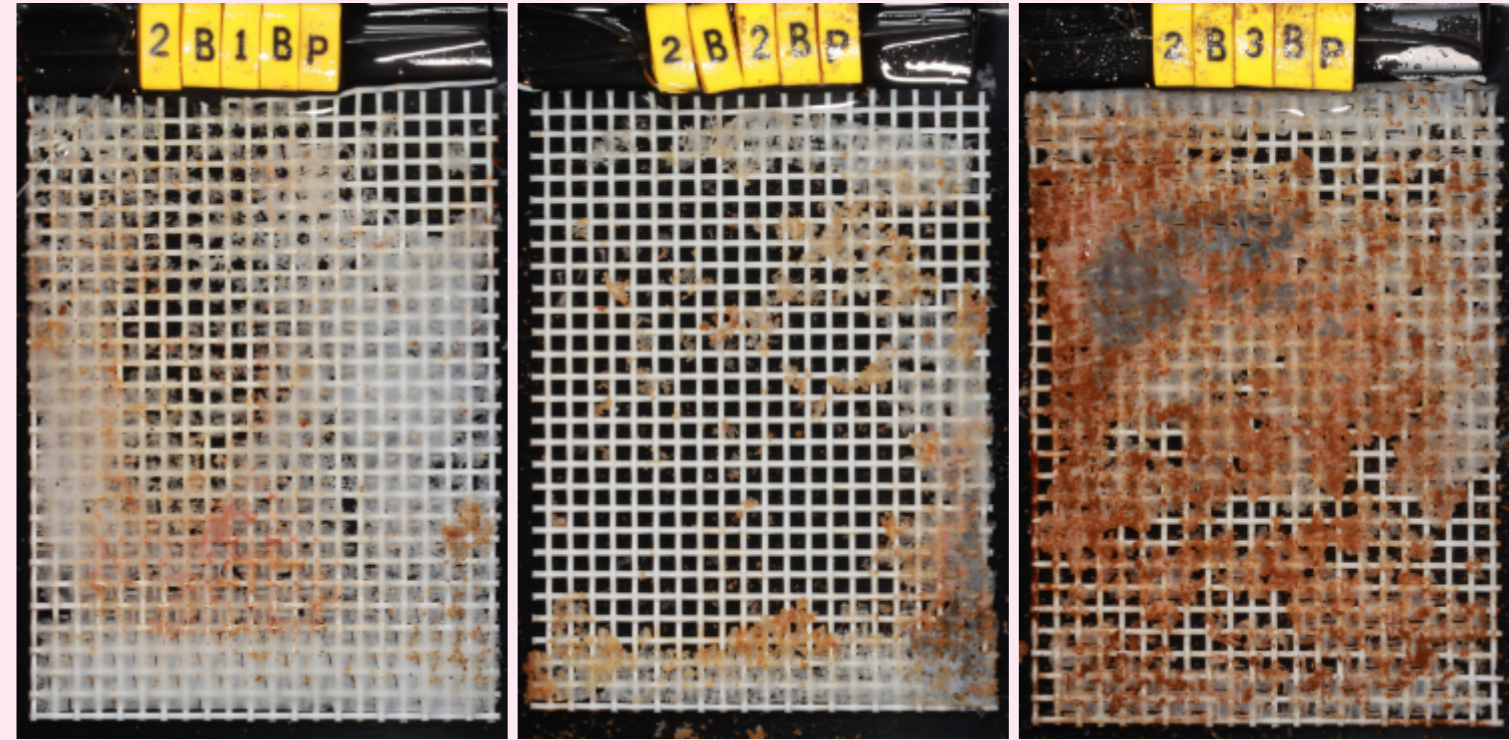

Naregno

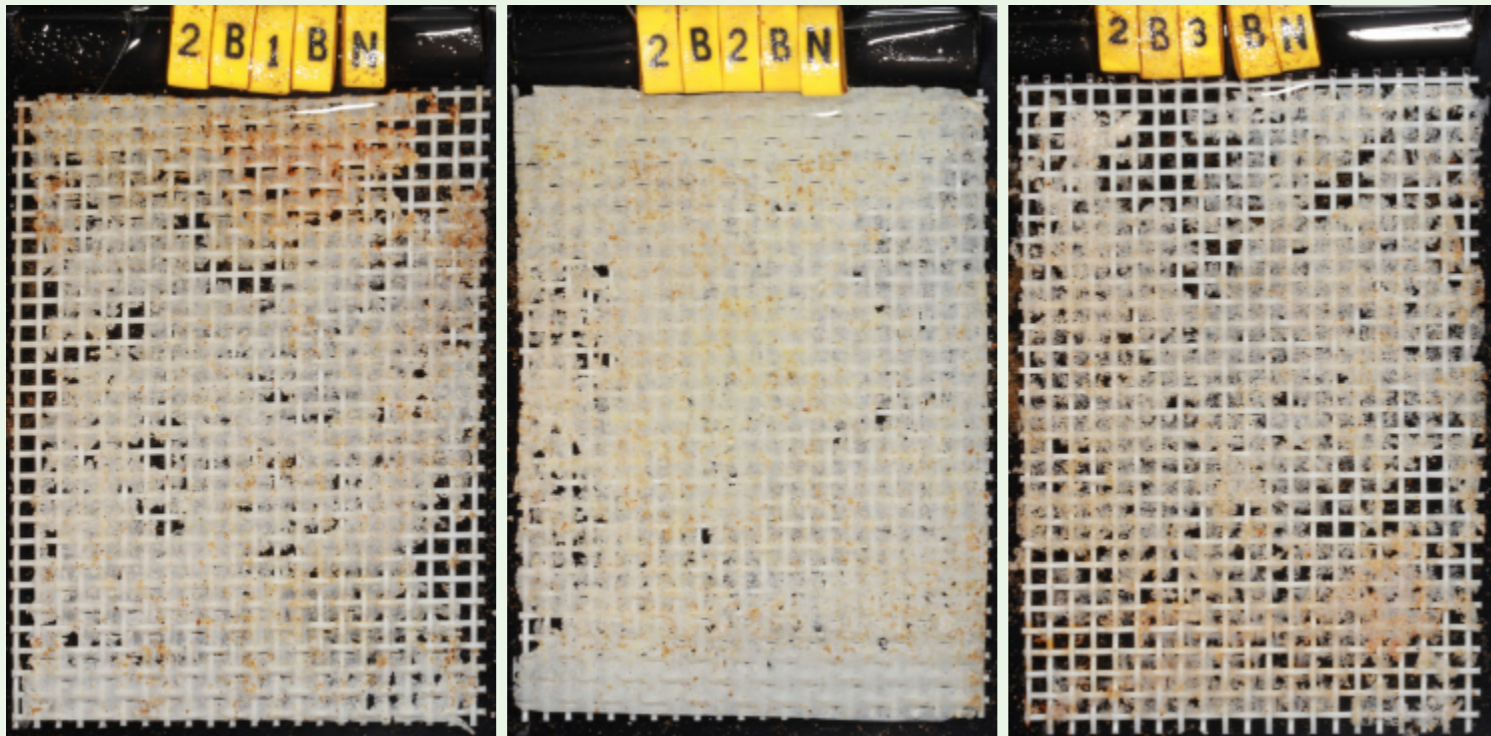

Fetovaia

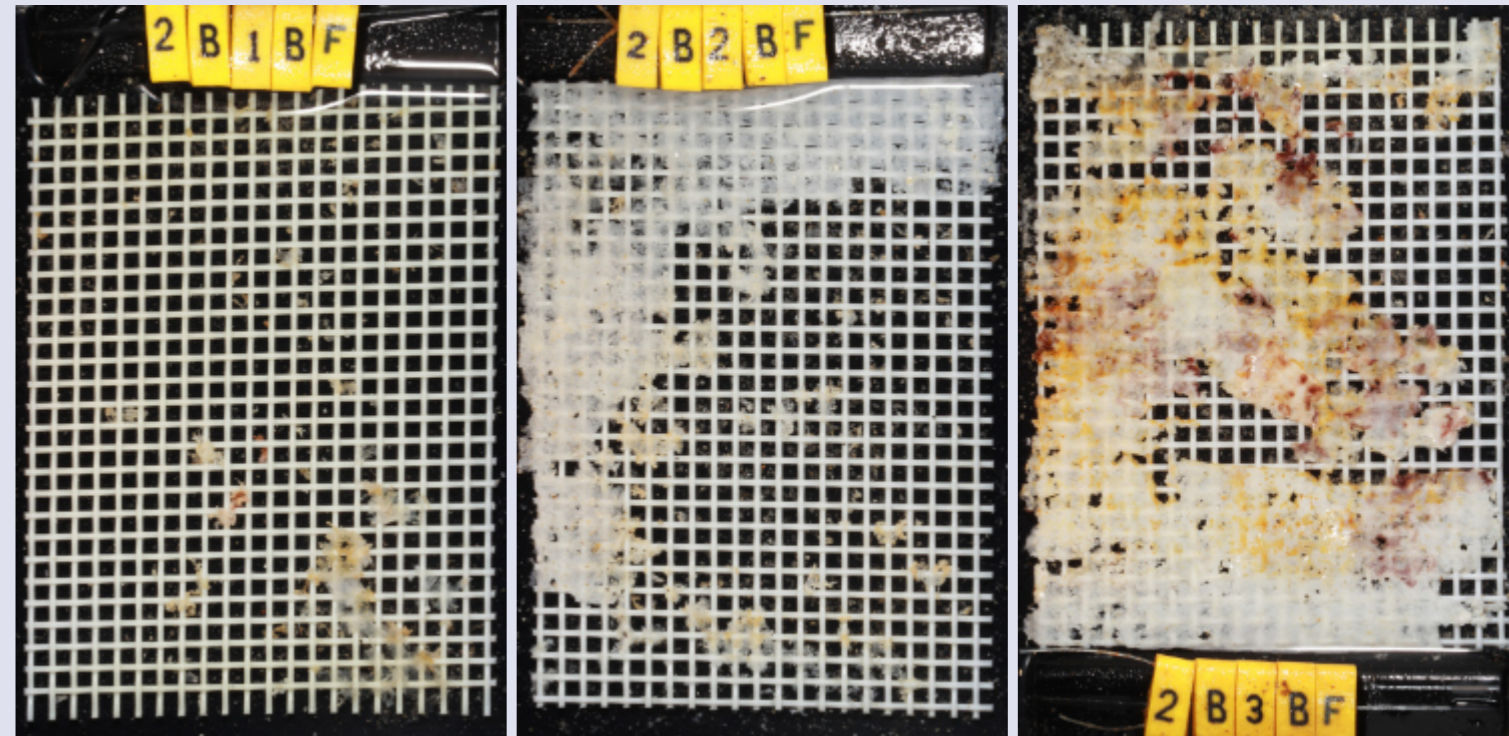

\*Specimen 2B2BF adhering to both meshes.  
See pages 54–55 for details.



F)

Performance of *PHB* 85  $\mu\text{m}$  on 3 sediments after 8 months, and on 1 sediment after 12 months

Marina di Campo

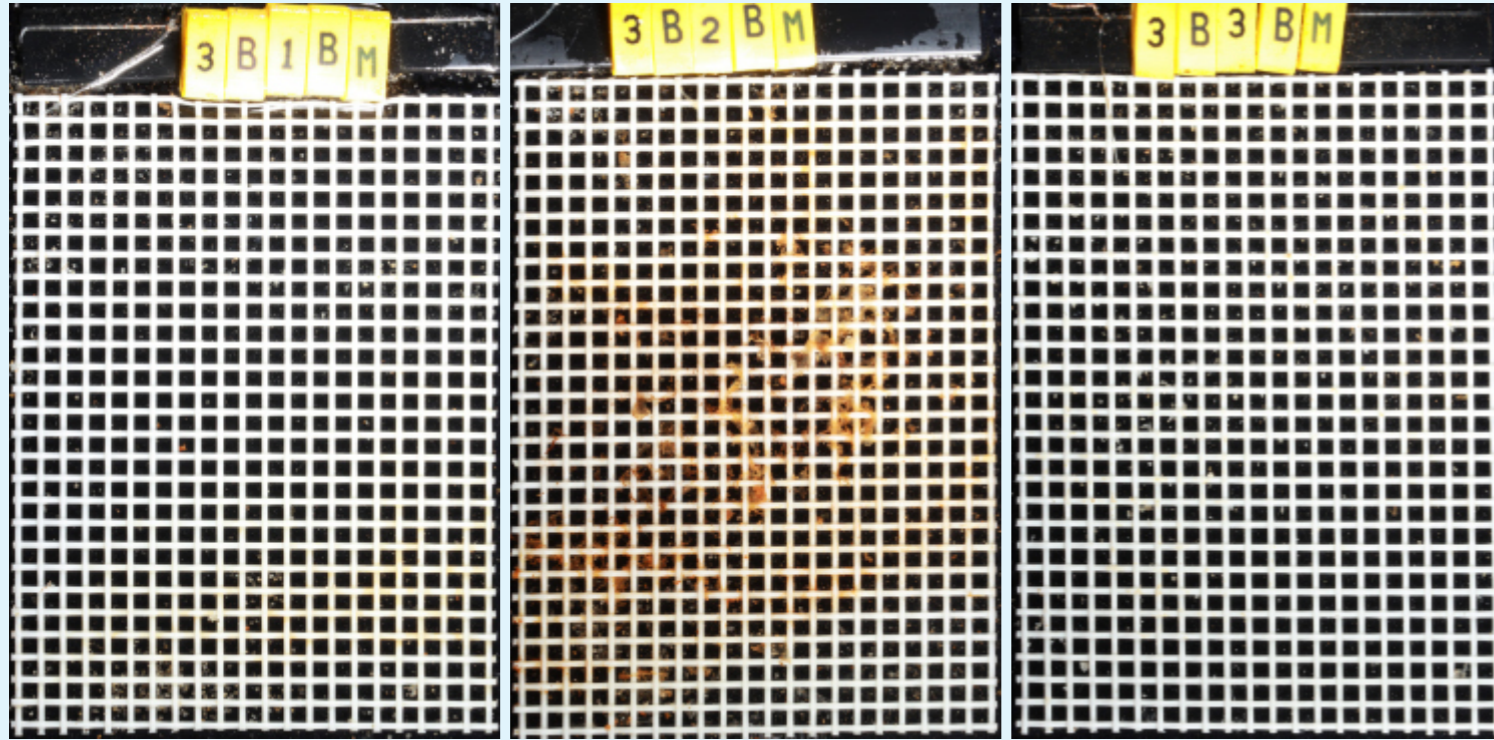

Portoferraio

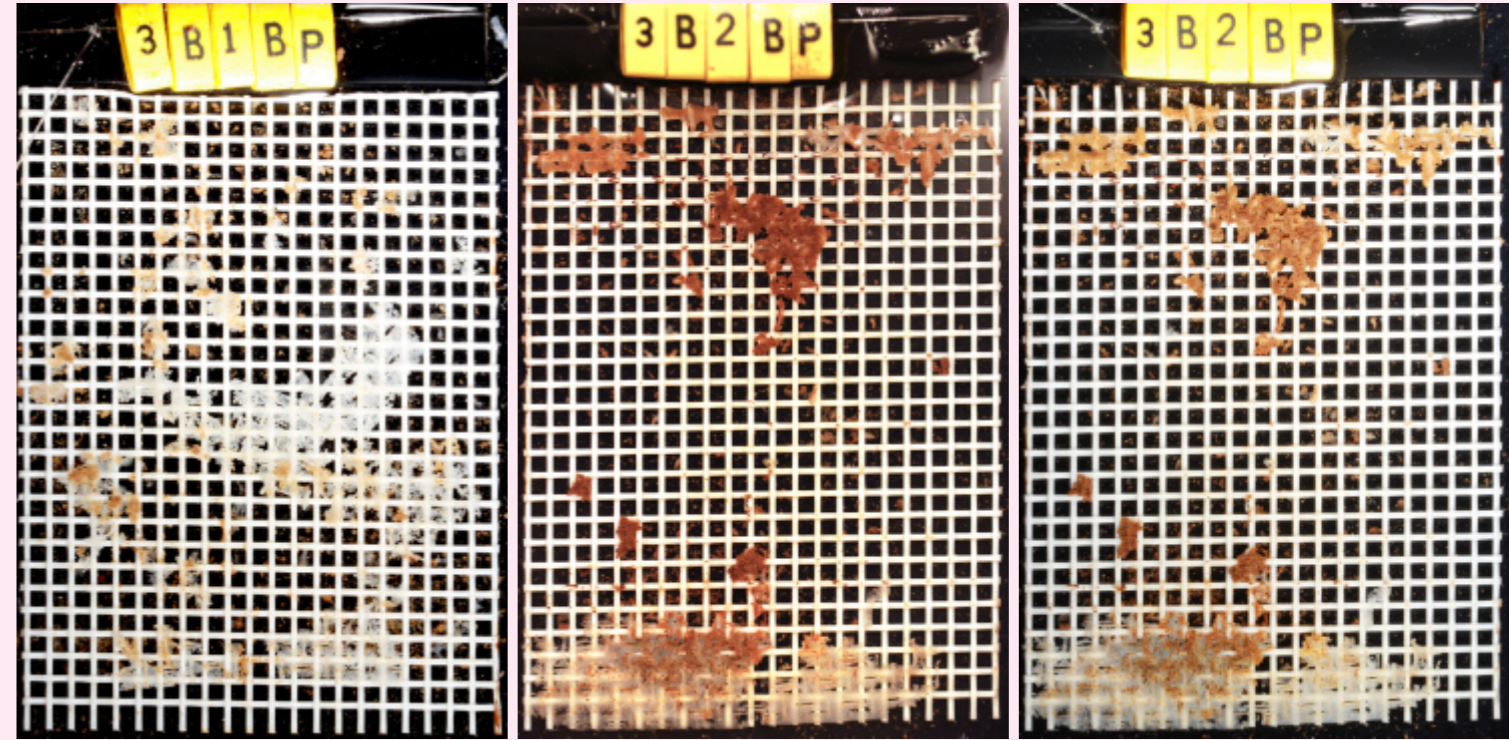

Naregno

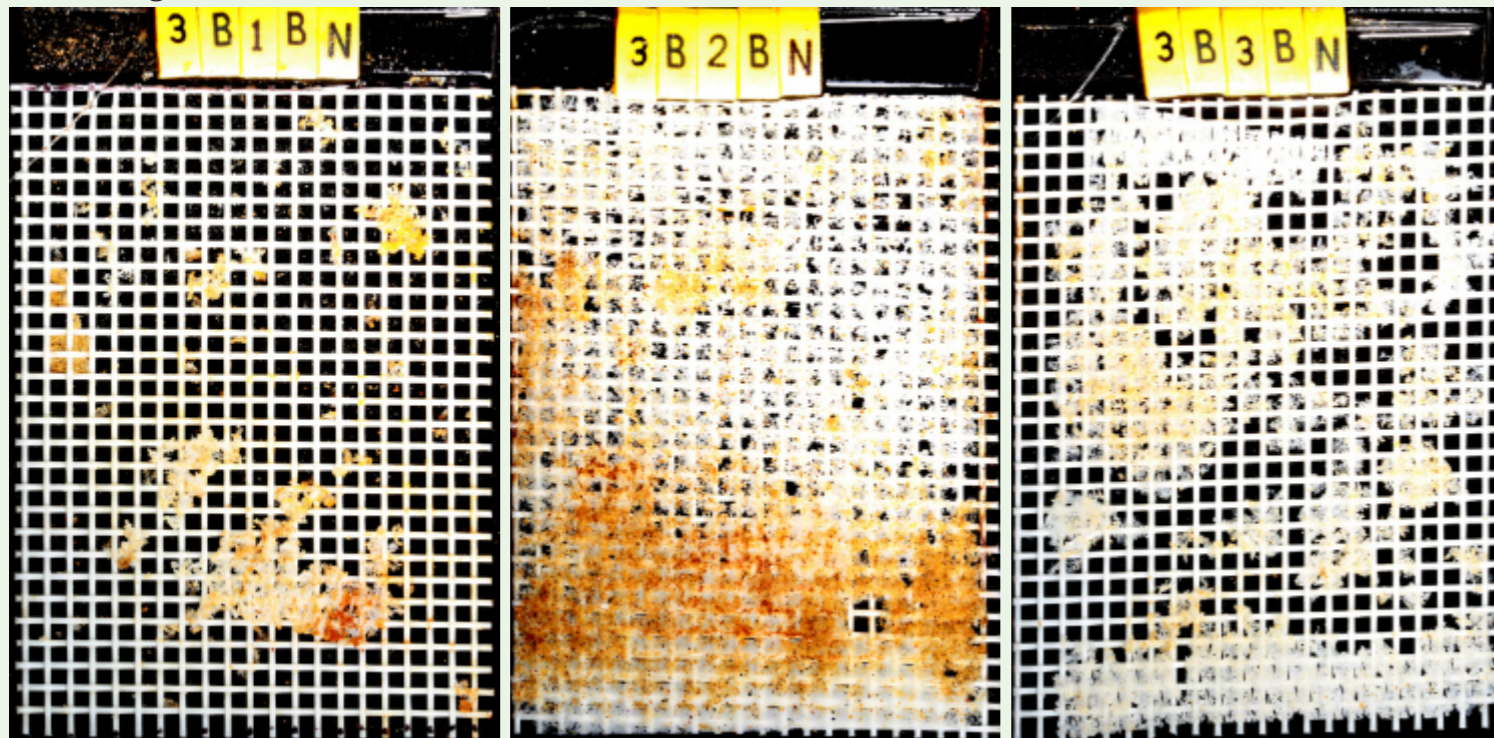

Fetovaia

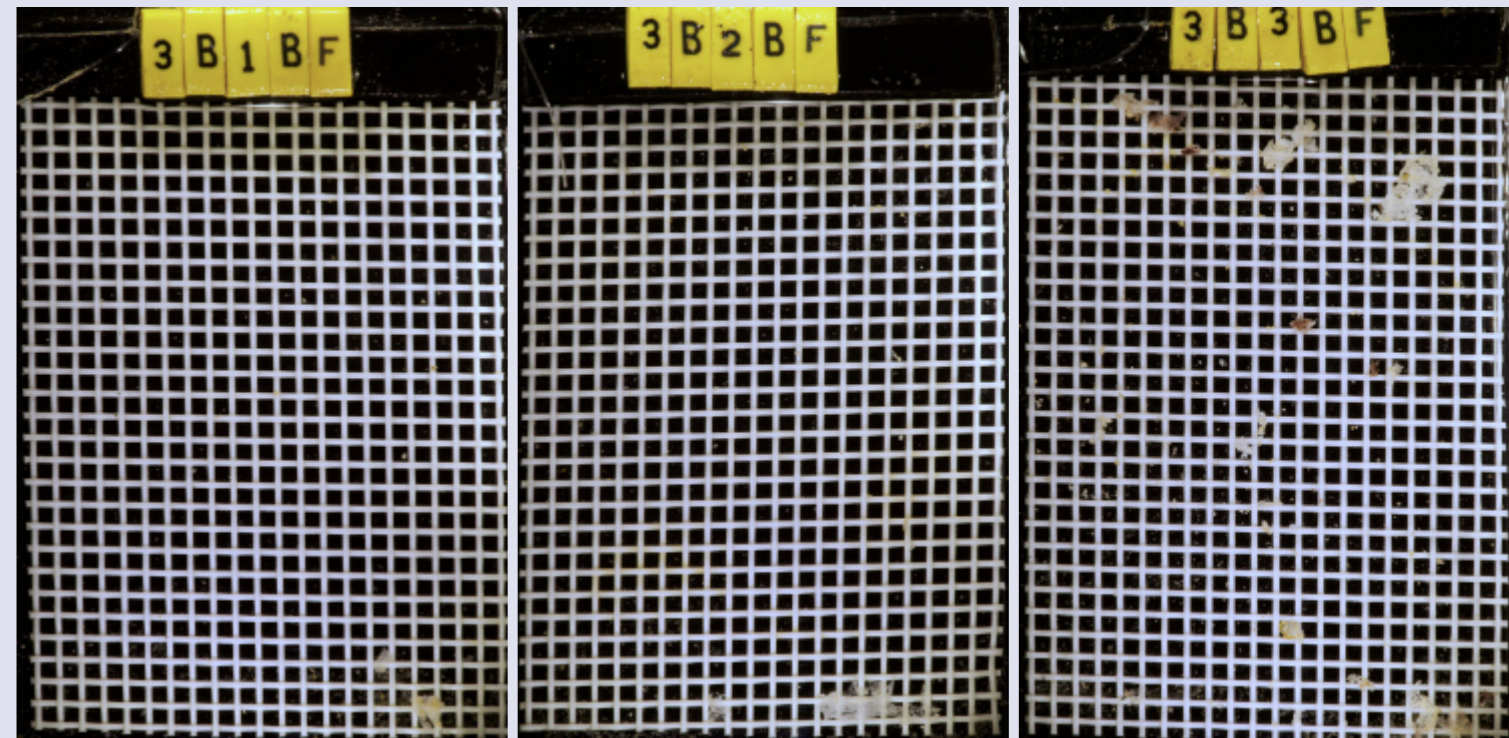

sampled after 12months
